# Supplementary material for: Expanding the range of binding energies and oxidizability of biologically relevant S–aromatic interactions: imidazolium and phenolate binding to sulfoxide and sulfone
Source: Royal Society of Chemistry journal article supplement (doi:10.1039/c9cp02332a), 2019-01-01
Supplement: c9cp02332a1.pdf [file c9cp02332a1.pdf]

Supporting information for:

**Expanding the range of binding energies and oxidizability of biologically relevant S-aromatic interactions: Imidazolium and phenolate binding to sulfoxide and sulfone**

*Esam A. Orabi<sup>a,†</sup> and Ann M. English<sup>\*,a</sup>*

<sup>a</sup>Center for Research in Molecular Modeling (CERMM), Quebec Network for Research on Protein Function, Engineering, and Applications (PROTEO), and Department of Chemistry and Biochemistry, Concordia University, 7141 Sherbrooke Street West, Montréal, Québec H4B 1R6, Canada

<sup>†</sup>On leave from the Department of Chemistry, Faculty of Science, Assiut University, Assiut 71516, Egypt

\* Corresponding author. E-mail: [ann.english@concordia.ca](mailto:ann.english@concordia.ca).

Tel.: +1-514-848-2424, extension 3338; Fax: +1-514-848-2868

**Table of contents**

|                                                                                                                                                                               |         |
|-------------------------------------------------------------------------------------------------------------------------------------------------------------------------------|---------|
| Geometries for local minima conformers (Fig. S1 – Fig. S8) .....                                                                                                              | S2–S9   |
| Binding energies, IPVs, net charge and sum of Mulliken atomic spin densities on the non-aromatic ligand of the global plus local minima conformers (Table S1 – Table S8)..... | S2–S9   |
| Fig. S9: PMF between Me <sub>2</sub> S and the aromatic ions in bulk water.....                                                                                               | S10     |
| Atomic coordinates of the complexes presented in Fig. 2 (main text).....                                                                                                      | S11–S14 |
| Atomic coordinates of the complexes presented in Fig. S1– Fig. S8 (SI).....                                                                                                   | S15–S32 |

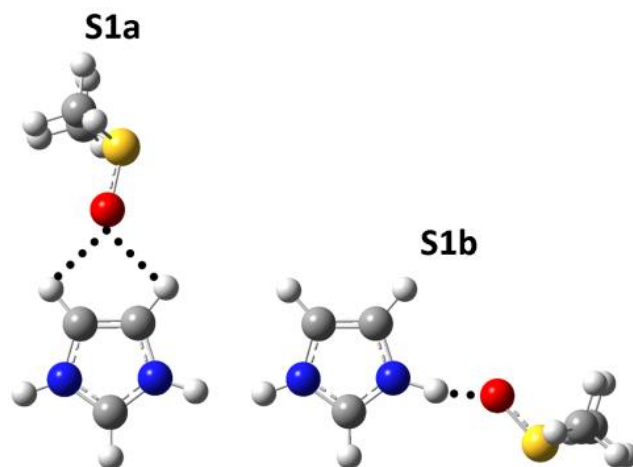

**Fig. S1.** Optimized geometries of the Me<sub>2</sub>SO-imidazolium conformers at the MP2(full)/6-311++G(d,p) level of theory in the gas phase. Atom color code: hydrogen (white), carbon (gray), nitrogen (blue), oxygen (red) and sulfur (yellow). Dotted black lines show intermolecular  $\sigma$ -type H-bonds. The atomic coordinates are provided starting on page S11. The global minimum conformer **1a** is shown in Fig. 2 of the main text but not here.

**Table S1.** Ab initio equilibrium distance ( $r_{SX}$ , Å), angle ( $\theta_{SXY}$ , degrees), binding energy ( $E$  and  $E^{CP}$ , kcal/mol), net charge of Me<sub>2</sub>SO in the cationic complexes (e), IPV (eV), sum of Mulliken atomic spin densities for Me<sub>2</sub>SO in the (+2) radicals, and the MM binding energy (kcal/mol) calculated with the default ( $E^{MM}$ ) and optimized ( $E^{MM,opt}$ ) FF for the Me<sub>2</sub>SO-imidazolium conformers in Fig. S1

| Conformer             | $r_{SX}$ | $\theta_{SXY}$ | $E$    | $E^{CP}$ | $E^{MM}$ | $E^{MM,opt}$ | Me <sub>2</sub> SO charge | Me <sub>2</sub> SO spin density | IPV <sup>a</sup> |
|-----------------------|----------|----------------|--------|----------|----------|--------------|---------------------------|---------------------------------|------------------|
| <b>S1a</b>            | 5.174    | 90             | -20.02 | -17.77   | -19.64   | -20.34       | 0.02                      | 1.0                             | 12.21            |
| <b>S1b</b>            | 5.018    | 90             | -35.54 | -30.77   | -24.50   | -31.48       | 0.10                      | 1.0                             | 13.24            |
| <b>1a<sup>b</sup></b> | 4.988    | 90             | -35.96 | -31.13   | -24.49   | -31.42       | 0.10                      | 1.0                             | 13.26            |

<sup>a</sup> The IPV of free Me<sub>2</sub>SO is 9.20 eV (see Footnote c to Table 2 of the main text).

<sup>b</sup> The structure of the global minimum conformer **1a** is shown in Fig. 2 of the main text.

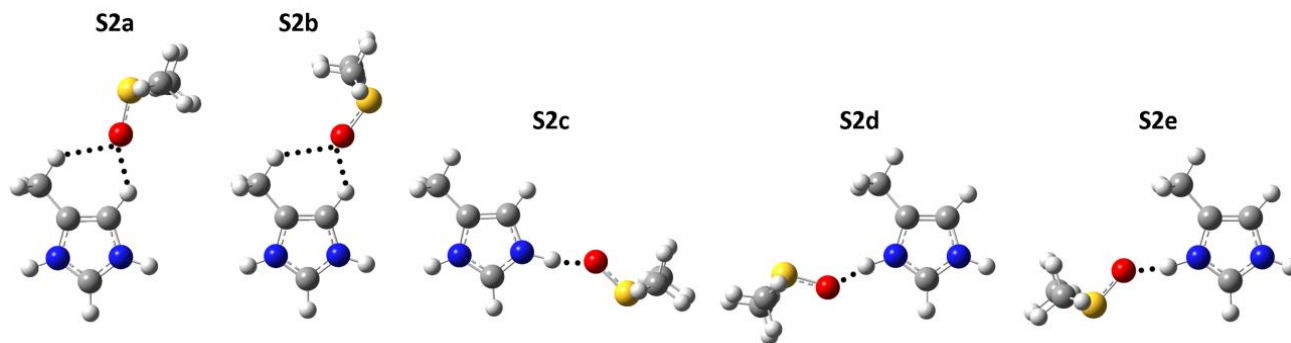

**Fig. S2.** Optimized geometries of the Me<sub>2</sub>SO-4-methylimidazolium conformers at the MP2(full)/6-311++G(d,p) level of theory in the gas phase. See Fig. S1 for details of the structure representation and the atomic coordinates are provided starting on page S11. The global minimum conformer **1b** is shown in Fig. 2 of the main text but not here.

**Table S2.** Ab initio equilibrium distance ( $r_{SX}$ , Å), angle ( $\theta_{SXY}$ , degrees), binding energy ( $E$  and  $E^{CP}$ , kcal/mol), net charge of Me<sub>2</sub>SO in the cationic complexes (e), IPV (eV), sum of Mulliken atomic spin densities for Me<sub>2</sub>SO in the (+2) radicals, and the MM binding energy (kcal/mol) calculated with the default ( $E^{MM}$ ) and optimized ( $E^{MM,opt}$ ) FF for the Me<sub>2</sub>SO-4-methylimidazolium conformers in Fig. S2

| Conformer             | $r_{SX}$ | $\theta_{SXY}$ | $E$    | $E^{CP}$ | $E^{MM}$ | $E^{MM,opt}$ | Me <sub>2</sub> SO charge | Me <sub>2</sub> SO spin density | IPV <sup>a</sup> |
|-----------------------|----------|----------------|--------|----------|----------|--------------|---------------------------|---------------------------------|------------------|
| <b>S2a</b>            | 5.482    | 90             | -20.09 | -17.45   | -17.12   | -17.59       | 0.02                      | 1.0                             | 12.20            |
| <b>S2b</b>            | 5.431    | 90             | -20.66 | -17.69   | -17.09   | -17.58       | 0.03                      | 1.0                             | 12.21            |
| <b>S2c</b>            | 5.033    | 90             | -33.97 | -29.23   | -24.19   | -31.11       | 0.09                      | 1.0                             | 13.10            |
| <b>S2d</b>            | 4.996    | 90             | -34.29 | -29.23   | -24.29   | -31.20       | 0.10                      | 1.0                             | 13.15            |
| <b>S2e</b>            | 5.025    | 90             | -34.25 | -29.34   | -24.28   | -31.17       | 0.10                      | 1.0                             | 13.15            |
| <b>1b<sup>b</sup></b> | 5.004    | 90             | -34.32 | -29.52   | -24.16   | -31.02       | 0.10                      | 1.0                             | 13.13            |

<sup>a</sup> The IPV of free Me<sub>2</sub>SO is 9.20 eV (see Footnote c to Table 2 of the main text).

<sup>b</sup> The structure of the global minimum conformer **1b** is shown in Fig. 2 of the main text.

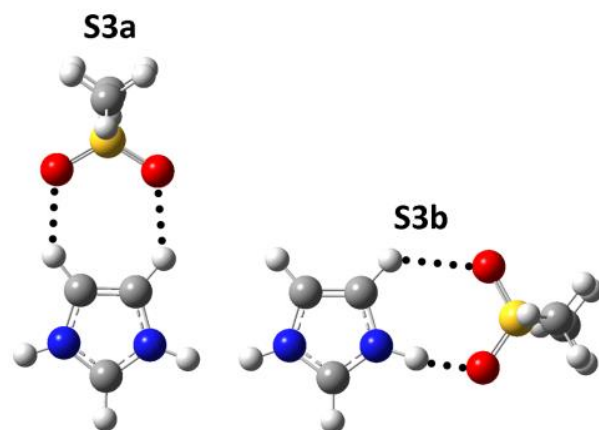

**Fig. S3.** Optimized geometries of the  $\text{Me}_2\text{SO}_2$ -imidazolium conformers at the MP2(full)/6-311++G(d,p) level of theory in the gas phase. See Fig. S1 for details of the structure representation and the atomic coordinates are provided starting on page S11. The global minimum conformer **2a** is shown in Fig. 2 of the main text but not here.

**Table S3.** Ab initio equilibrium distance ( $r_{\text{SX}}, \text{\AA}$ ), angle ( $\theta_{\text{SXY}}$ , degrees), binding energy ( $E$  and  $E^{\text{CP}}$ , kcal/mol), net charge of  $\text{Me}_2\text{SO}_2$  in the cationic complexes ( $e$ ), IPV (eV), sum of Mulliken atomic spin densities for  $\text{Me}_2\text{SO}_2$  in the (+2) radicals, and the MM binding energy calculated with the default FF ( $E^{\text{MM}}$ , kcal/mol) for the  $\text{Me}_2\text{SO}_2$ -imidazolium conformers in Fig. S3

| Conformer              | $r_{\text{SX}}$ | $\theta_{\text{SXY}}$ | $E$    | $E^{\text{CP}}$ | $E^{\text{MM}}$ | $\text{Me}_2\text{SO}_2$<br>charge | $\text{Me}_2\text{SO}_2$<br>spin density | IPV <sup>a</sup> |
|------------------------|-----------------|-----------------------|--------|-----------------|-----------------|------------------------------------|------------------------------------------|------------------|
| <b>S3d</b>             | 4.715           | 90                    | -19.78 | -17.16          | -20.46          | 0.02                               | 0.0                                      | 14.26            |
| <b>S3e</b>             | 4.574           | 90                    | -29.00 | -25.03          | -24.63          | 0.07                               | 0.0                                      | 14.11            |
| <b>2a</b> <sup>b</sup> | 4.547           | 90                    | -29.55 | -25.62          | -26.07          | 0.06                               | 0.0                                      | 14.12            |

<sup>a</sup> The IPV of free imidazolium is 15.34 eV (see Footnote c to Table 2 of the main text).

<sup>b</sup> The structure of the global minimum conformer **2a** is shown in Fig. 2 of the main text.

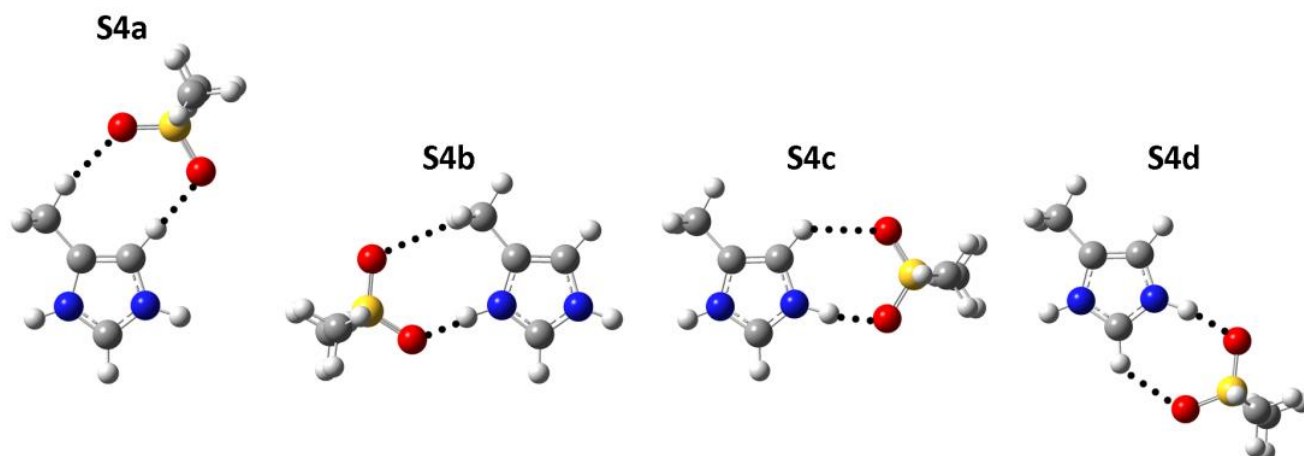

**Fig. S4.** Optimized geometries of the  $\text{Me}_2\text{SO}_2$ -4-methylimidazolium conformers at the MP2(full)/6-311++G(d,p) level of theory in the gas phase. See Fig. S1 for details of the structure representation and the atomic coordinates are provided starting on page S11. The global minimum conformer **2b** is shown in Fig. 2 of the main text but not here.

**Table S4.** Ab initio equilibrium distance ( $r_{\text{SX}}$ , Å), angle ( $\theta_{\text{SXY}}$ , degrees), binding energy ( $E$  and  $E^{\text{CP}}$ , kcal/mol), net charge of  $\text{Me}_2\text{SO}_2$  in the cationic complexes (e), IPV (eV), sum of Mulliken atomic spin densities for  $\text{Me}_2\text{SO}_2$  in the (+2) radicals, and the MM binding energy calculated with the default FF ( $E^{\text{MM}}$ , kcal/mol) for the  $\text{Me}_2\text{SO}_2$ -4-methylimidazolium conformers in Fig. S4

| Conformer             | $r_{\text{SX}}$ | $\theta_{\text{SXY}}$ | $E$    | $E^{\text{CP}}$ | $E^{\text{MM}}$ | $\text{Me}_2\text{SO}_2$ charge | $\text{Me}_2\text{SO}_2$ spin density | IPV <sup>a</sup> |
|-----------------------|-----------------|-----------------------|--------|-----------------|-----------------|---------------------------------|---------------------------------------|------------------|
| <b>S4a</b>            | 5.045           | 90                    | -18.93 | -15.81          | -19.46          | 0.03                            | 0.0                                   | 13.70            |
| <b>S4b</b>            | 4.873           | 84                    | -27.52 | -23.32          | -24.75          | 0.06                            | 0.0                                   | 13.54            |
| <b>S4c</b>            | 4.582           | 90                    | -27.93 | -23.89          | -24.27          | 0.06                            | 0.0                                   | 13.51            |
| <b>S4d</b>            | 4.562           | 90                    | -28.40 | -24.46          | -25.77          | 0.06                            | 0.0                                   | 13.52            |
| <b>2b<sup>b</sup></b> | 4.557           | 90                    | -28.58 | -24.50          | -25.83          | 0.06                            | 0.0                                   | 13.52            |

<sup>a</sup> The IPV of free 4-methylimidazolium is 14.64 eV (see Footnote c to Table 2 of the main text).

<sup>b</sup> The structure of the global minimum conformer **2b** is shown in Fig. 2 of the main text.

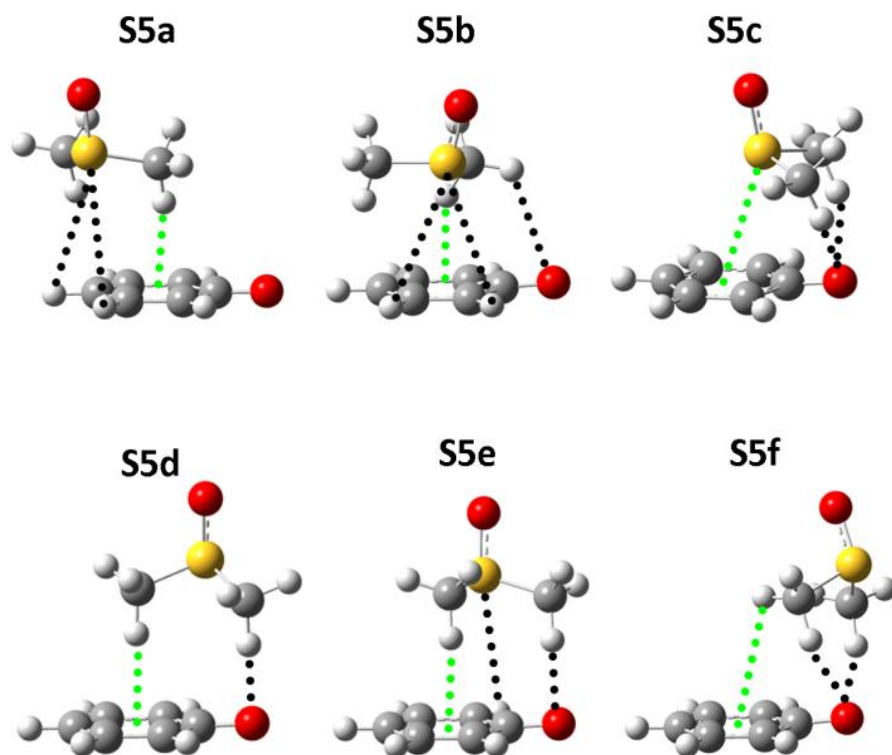

**Fig. S5.** Optimized geometries of the Me<sub>2</sub>SO-phenolate conformers at the MP2(full)/6-311++G(d,p) level of theory in the gas phase. See Fig. S1 for details of the structure representation. Dotted green lines show intermolecular  $\pi$ -type H-bonds. The atomic coordinates are provided starting on page S11. The global minimum conformer **1c** is shown in Fig. 2 of the main text but not here. Note that **S5a-S5e** are stabilized by  $\sigma$ -hole $\cdots\pi_{ar}$  interactions;  $\sigma$ -hole $\cdots O_{ar}$  interaction stabilizes **S5f**.

**Table S5.** Ab initio equilibrium distance ( $r_{SX}$ , Å), angle ( $\theta_{SXY}$ , degrees), binding energy ( $E$  and  $E^{CP}$ , kcal/mol), net charge of Me<sub>2</sub>SO (e), IPV (eV), sum of Mulliken atomic spin densities for Me<sub>2</sub>SO in the neutral radicals, and the MM binding energy calculated with the default FF ( $E^{MM}$ , kcal/mol) for the Me<sub>2</sub>SO-phenolate conformers in Fig. S5

| Conformer              | $r_{SX}$ | $\theta_{SXY}$ | $E$    | $E^{CP}$ | $E^{MM}$ | Me <sub>2</sub> SO charge | Me <sub>2</sub> SO spin density | IPV <sup>a</sup> |
|------------------------|----------|----------------|--------|----------|----------|---------------------------|---------------------------------|------------------|
| <b>S5a</b>             | 4.005    | 26             | -19.32 | -13.76   | -16.65   | -0.02                     | 0.0                             | 4.01             |
| <b>S5b</b>             | 3.965    | 27             | -19.76 | -13.92   | -16.00   | -0.02                     | 0.0                             | 4.01             |
| <b>S5c</b>             | 3.446    | 16             | -23.48 | -16.90   | -16.63   | -0.04                     | 0.0                             | 4.13             |
| <b>S5d</b>             | 4.287    | 24             | -23.06 | -17.00   | -16.62   | -0.03                     | 0.0                             | 4.17             |
| <b>S5e</b>             | 4.021    | 31             | -23.58 | -17.18   | -16.84   | -0.03                     | 0.0                             | 4.17             |
| <b>S5f</b>             | 4.973    | 37             | -22.28 | -17.47   | -16.57   | -0.04                     | 0.0                             | 4.16             |
| <b>1c</b> <sup>b</sup> | 5.455    | 84             | -22.01 | -18.09   | -16.82   | -0.03                     | 0.0                             | 4.10             |

<sup>a</sup> The IPV of free phenolate is 3.41 eV (see Footnote c to Table 2 of the main text).

<sup>b</sup> The structure of the global minimum conformer **1c** is shown in Fig. 2 of the main text.

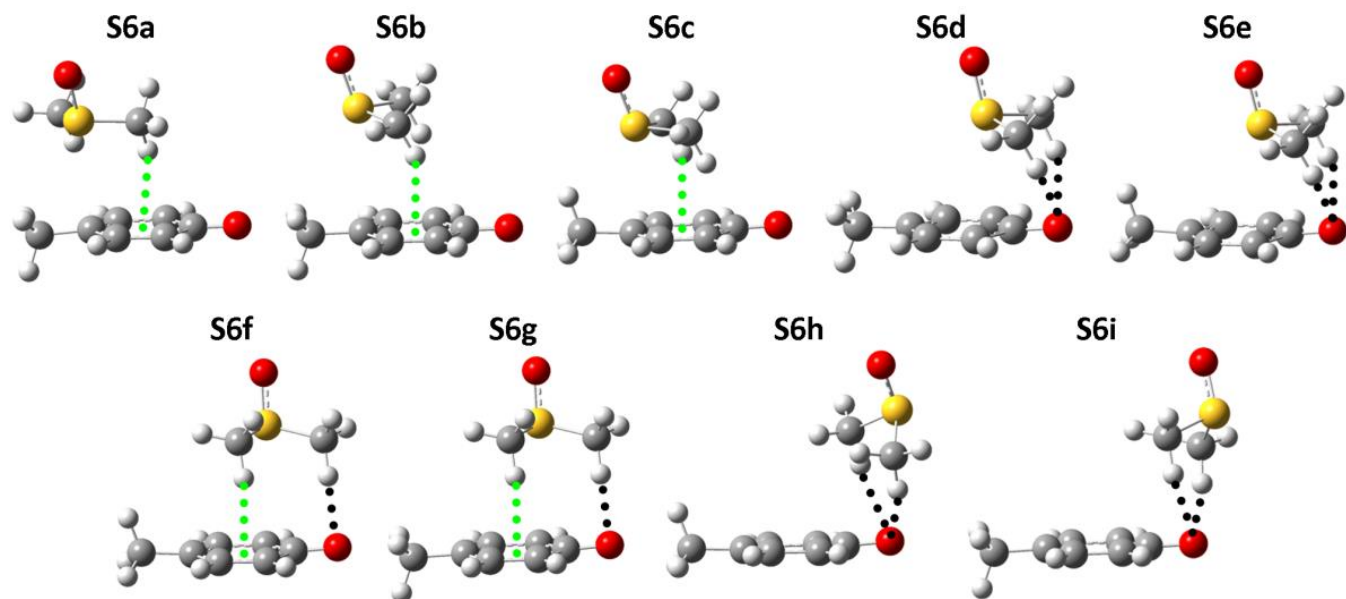

**Fig. S6.** Optimized geometries of the Me<sub>2</sub>SO-4-methylphenolate conformers at the MP2(full)/6-311++G(d,p) level of theory in the gas phase. See Fig. S1 for details of the structure representation. Dotted green lines show intermolecular  $\pi$ -type H-bonds. The atomic coordinates are provided starting on page S11. The global minimum conformer **1d** is shown in Fig. 2 of the main text but not here. Note that **S6a-S6g** are stabilized by  $\sigma$ -hole $\cdots\pi_{ar}$  interactions;  $\sigma$ -hole $\cdots O_{ar}$  interactions stabilize **S6h** and **S6i**.

**Table S6.** Ab initio equilibrium distance ( $r_{SX}$ , Å), angle ( $\theta_{SXY}$ , degrees), binding energy ( $E$  and  $E^{CP}$ , kcal/mol), net charge of Me<sub>2</sub>SO ( $e$ ), IPV (eV), sum of Mulliken atomic spin densities for Me<sub>2</sub>SO in the neutral radicals, and the MM binding energy calculated with the default FF ( $E^{MM}$ , kcal/mol) for the Me<sub>2</sub>SO-4-methylphenolate conformers in Fig. S6

| Conformer              | $r_{SX}$ | $\theta_{SXY}$ | $E$    | $E^{CP}$ | $E^{MM}$ | Me <sub>2</sub> SO charge | Me <sub>2</sub> SO spin density | IPV <sup>a</sup> |
|------------------------|----------|----------------|--------|----------|----------|---------------------------|---------------------------------|------------------|
| <b>S6a</b>             | 3.862    | 29             | -20.69 | -14.45   | -16.42   | -0.01                     | 0.0                             | 3.89             |
| <b>S6b</b>             | 3.909    | 30             | -20.66 | -14.58   | -16.22   | -0.01                     | 0.0                             | 3.91             |
| <b>S6c</b>             | 3.905    | 30             | -20.90 | -14.67   | -16.36   | -0.01                     | 0.0                             | 3.91             |
| <b>S6d</b>             | 3.367    | 13             | -23.85 | -17.09   | -16.66   | -0.04                     | 0.0                             | 4.01             |
| <b>S6e</b>             | 3.353    | 13             | -23.90 | -17.10   | -16.67   | -0.03                     | 0.0                             | 4.01             |
| <b>S6f</b>             | 3.963    | 30             | -23.79 | -17.34   | -16.95   | -0.03                     | 0.0                             | 4.05             |
| <b>S6g</b>             | 3.977    | 30             | -23.77 | -17.40   | -16.95   | -0.03                     | 0.0                             | 4.05             |
| <b>S6h</b>             | 4.982    | 40             | -22.41 | -17.66   | -16.55   | -0.04                     | 0.0                             | 4.04             |
| <b>S6i</b>             | 5.096    | 43             | -22.40 | -17.82   | -16.49   | -0.04                     | 0.0                             | 4.05             |
| <b>1d</b> <sup>b</sup> | 5.481    | 87             | -22.06 | -18.25   | -16.93   | -0.03                     | 0.0                             | 3.98             |

<sup>a</sup> The IPV of free 4-methylphenolate is 3.31 eV (see Footnote c to Table 2 of the main text).

<sup>b</sup> The structure of the global minimum conformer **1d** is shown in Fig. 2 of the main text.

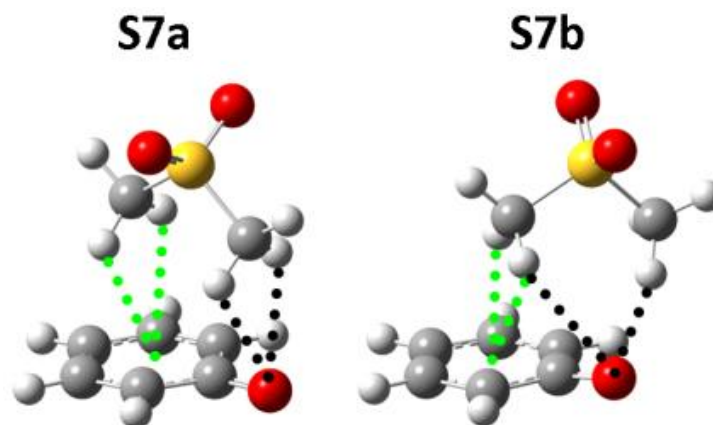

**Fig. S7.** Optimized geometries of the  $\text{Me}_2\text{SO}_2$ -phenolate conformers at the MP2(full)/6-311++G(d,p) level of theory in the gas phase. See Fig. S1 for details of the structure representation. Dotted green lines show intermolecular  $\pi$ -type H-bonds. The atomic coordinates are provided starting on page S11. The global minimum conformer **2c** is shown in Fig. 2 of the main text but not here. Note that **S7a** and **S7b** are stabilized by  $\sigma$ -hole $\cdots\pi_{\text{ar}}$  interactions;  $\sigma$ -hole $\cdots\text{O}_{\text{ar}}$  interaction additionally stabilizes **S7b**.

**Table S7.** Ab initio equilibrium distance ( $r_{\text{SX}}$ , Å), angle ( $\theta_{\text{SXY}}$ , degrees), binding energy ( $E$  and  $E^{\text{CP}}$ , kcal/mol), net charge of  $\text{Me}_2\text{SO}_2$  (e), IPV (eV), sum of Mulliken atomic spin densities for  $\text{Me}_2\text{SO}_2$  in the neutral radicals, and the MM binding energy calculated with the default FF ( $E^{\text{MM}}$ , kcal/mol) for the  $\text{Me}_2\text{SO}_2$ -phenolate conformers in Fig. S7

| Conformer              | $r_{\text{SX}}$ | $\theta_{\text{SXY}}$ | $E$    | $E^{\text{CP}}$ | $E^{\text{MM}}$ | $\text{Me}_2\text{SO}_n$ charge | $\text{Me}_2\text{SO}_n$ spin density | IPV <sup>a</sup> |
|------------------------|-----------------|-----------------------|--------|-----------------|-----------------|---------------------------------|---------------------------------------|------------------|
| <b>S7a</b>             | 4.387           | 16                    | -24.64 | -19.39          | -23.89          | -0.03                           | 0.0                                   | 4.27             |
| <b>S7b</b>             | 4.513           | 26                    | -26.20 | -20.52          | -23.47          | -0.03                           | 0.0                                   | 4.29             |
| <b>2c</b> <sup>b</sup> | 4.839           | 36                    | -25.54 | -20.73          | -21.70          | -0.04                           | 0.0                                   | 4.29             |

<sup>a</sup> The IPV of free phenolate is 3.41 eV (see Footnote c to Table 2 of the main text).

<sup>b</sup> The structure of the global minimum conformer **2c** is shown in Fig. 2 of the main text.



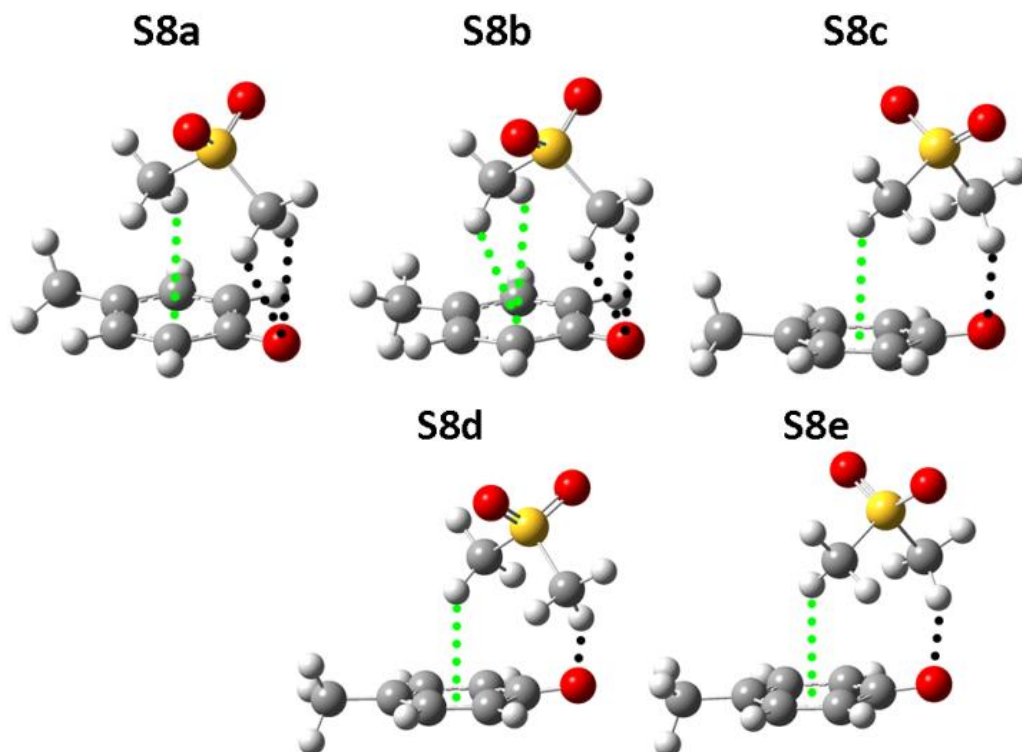

**Fig. S8.** Optimized geometries of the  $\text{Me}_2\text{SO}_2$ -4-methylphenolate conformers at the MP2(full)/6-311++G(d,p) level of theory in the gas phase. See Fig. S1 for details of the structure representation. Dotted green lines show intermolecular  $\pi$ -type H-bonds. The atomic coordinates are provided starting on page S11. The global minimum conformer **2d** is shown in Fig. 2 of the main text but not here. Note that **S8a-S8e** are stabilized by  $\sigma$ -hole $\cdots\pi_{\text{ar}}$  interactions;  $\sigma$ -hole $\cdots\text{O}_{\text{ar}}$  interactions additionally stabilize **S8c-S8e**.

**Table S8.** Ab initio equilibrium distance ( $r_{\text{SX}}, \text{\AA}$ ), angle ( $\theta_{\text{SXY}}$ , degrees), binding energy ( $E$  and  $E^{\text{CP}}$ , kcal/mol), net charge of  $\text{Me}_2\text{SO}_2$  (e), IPV (eV), sum of Mulliken atomic spin densities for  $\text{Me}_2\text{SO}_2$  in the neutral radicals, and the MM binding energy calculated with the default FF ( $E^{\text{MM}}$ , kcal/mol) for the  $\text{Me}_2\text{SO}_2$ -4-methylphenolate conformers in Fig. S8

| Conformer             | $r_{\text{SX}}$ | $\theta_{\text{SXY}}$ | $E$    | $E^{\text{CP}}$ | $E^{\text{MM}}$ | $\text{Me}_2\text{SO}_2$ charge | $\text{Me}_2\text{SO}_2$ spin density | IPV <sup>a</sup> |
|-----------------------|-----------------|-----------------------|--------|-----------------|-----------------|---------------------------------|---------------------------------------|------------------|
| <b>S8a</b>            | 4.365           | 16                    | -24.84 | -19.47          | -23.86          | -0.02                           | 0.0                                   | 4.15             |
| <b>S8b</b>            | 4.373           | 17                    | -24.83 | -19.60          | -23.96          | -0.02                           | 0.0                                   | 4.15             |
| <b>S8c</b>            | 4.473           | 23                    | -26.38 | -20.63          | -23.54          | -0.03                           | 0.0                                   | 4.17             |
| <b>S8d</b>            | 4.474           | 25                    | -26.43 | -20.68          | -23.64          | -0.03                           | 0.0                                   | 4.16             |
| <b>S8e</b>            | 4.492           | 25                    | -26.30 | -20.71          | -23.56          | -0.03                           | 0.0                                   | 4.16             |
| <b>2d<sup>b</sup></b> | 4.881           | 39                    | -25.77 | -21.03          | -22.63          | -0.04                           | 0.0                                   | 4.17             |

<sup>a</sup> The IPV of free 4-methylphenolate is 3.31 eV (see Footnote c to Table 2 of the main text).

<sup>b</sup> The structure of the global minimum conformer **2d** is shown in Fig. 2 of the main text.

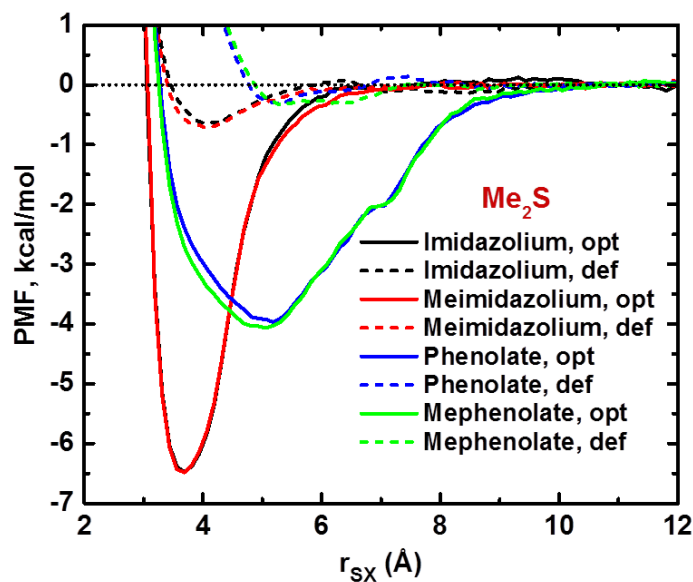

**Fig. S9.** Potential of mean force (PMF, kcal/mol) as a function of distance between the S atom of (A)  $\text{Me}_2\text{S}$  and the ring centroid X ( $r_{\text{SX}}$ , Å) of imidazolium ion (black), 4-methylimidazolium ion (red), phenolate ion (blue), and 4-methylphenolate ion (green) in bulk water at 298.15 K. Solid curves were calculated using our previous optimized pair specific LJ parameters for the  $\text{Me}_2\text{S}$ -aromatic ions and for  $\text{H}_2\text{O}$ -phenolate (see Ref. 18 of the main text) plus revised parameters for  $\text{Me}_2\text{S}$ - $\text{H}_2\text{O}$  interactions optimized in a previous work (see Ref. 19 of the main text). The dashed curves are calculated with the default FF parameters (i.e., without pair specific LJ parameters between any pair).

Notably, the default parameters in Fig. S9 predict very weak  $\text{Me}_2\text{S}$  affinity for the ions in water ( $-0.3$  to  $-0.7$  kcal/mol), which we attribute to underestimation of their gas-phase affinities (Ref. 18 of the main text). The optimized FF for  $\text{Me}_2\text{S}$ -imidazoliums (Ref. 18 of the main text) and for  $\text{Me}_2\text{S}$ - $\text{H}_2\text{O}$  (Ref. 19 of the main text) gives a binding free energy for  $\text{Me}_2\text{S}$ -imidazolium of  $-6.0$  kcal/mol and for  $\text{Me}_2\text{S}$ -phenolate of  $-3.9$  kcal/mol.

## Atomic coordinates of the global minimum conformers in Fig. 2

### *Conformer 1a*

|   |           |           |           |
|---|-----------|-----------|-----------|
| C | 3.178405  | 0.213642  | -1.354470 |
| H | 3.209679  | 1.299570  | -1.250712 |
| H | 4.181203  | -0.218571 | -1.335621 |
| H | 2.674831  | -0.063778 | -2.280569 |
| S | 2.223701  | -0.465948 | -0.001043 |
| C | 3.177365  | 0.207825  | 1.356009  |
| H | 3.208442  | 1.294213  | 1.257086  |
| H | 2.673275  | -0.073798 | 2.280562  |
| H | 4.180280  | -0.224061 | 1.335907  |
| O | 0.920443  | 0.360908  | 0.000183  |
| C | -2.395798 | -1.131331 | -0.002283 |
| C | -3.702569 | -0.705383 | -0.001382 |
| C | -2.370556 | 1.073074  | 0.002133  |
| N | -1.599805 | -0.013621 | -0.000123 |
| H | -0.522821 | 0.024386  | -0.000156 |
| H | -1.989161 | -2.129914 | -0.004304 |
| H | -4.631248 | -1.253005 | -0.002427 |
| H | -2.027139 | 2.095515  | 0.004160  |
| N | -3.652790 | 0.668132  | 0.001358  |
| H | -4.453013 | 1.288811  | 0.002627  |

### *Conformer 1b*

|   |           |           |           |
|---|-----------|-----------|-----------|
| C | -3.679485 | 0.032528  | 1.355389  |
| H | -3.796922 | 1.114727  | 1.277202  |
| H | -4.644771 | -0.477361 | 1.323560  |
| H | -3.156340 | -0.225490 | 2.276248  |
| S | -2.671198 | -0.536266 | -0.010817 |
| C | -3.676995 | 0.090475  | -1.353307 |
| H | -3.794812 | 1.168324  | -1.229102 |
| H | -3.152114 | -0.127839 | -2.283403 |
| H | -4.642250 | -0.420405 | -1.345173 |
| O | -1.438432 | 0.389468  | 0.010302  |
| C | 2.002017  | -0.823826 | -0.010812 |
| C | 3.279389  | -0.306079 | -0.004428 |
| C | 1.797834  | 1.369492  | 0.019809  |
| N | 1.116975  | 0.225551  | 0.004335  |
| H | 0.046262  | 0.175373  | 0.004342  |
| H | 1.675128  | -1.851615 | -0.024603 |
| H | 1.374813  | 2.361559  | 0.034133  |
| N | 3.108425  | 1.063376  | 0.014583  |
| H | 3.856530  | 1.746382  | 0.023624  |
| C | 4.616301  | -0.962816 | -0.014486 |
| H | 5.189449  | -0.674662 | -0.899417 |
| H | 5.190503  | -0.699774 | 0.877550  |
| H | 4.488985  | -2.045848 | -0.029719 |

**Conformer 1c**

|   |           |           |           |
|---|-----------|-----------|-----------|
| C | 2.766391  | -1.519456 | -0.326172 |
| C | 3.979479  | -0.870050 | -0.051572 |
| C | 3.946406  | 0.512774  | 0.188778  |
| C | 2.738399  | 1.210663  | 0.225599  |
| C | 1.477321  | 0.586567  | -0.058124 |
| C | 1.553387  | -0.829479 | -0.288308 |
| H | 2.760987  | -2.591944 | -0.523047 |
| H | 0.622160  | -1.348654 | -0.512787 |
| H | 4.922893  | -1.408977 | -0.088043 |
| H | 4.874567  | 1.045513  | 0.398436  |
| H | 2.727782  | 2.283072  | 0.415276  |
| O | 0.363227  | 1.229315  | -0.066269 |
| C | -2.589000 | 1.177562  | -0.883821 |
| H | -3.200757 | 1.850254  | -0.276025 |
| H | -1.530937 | 1.463859  | -0.886026 |
| H | -2.995620 | 1.120555  | -1.895306 |
| S | -2.700876 | -0.470116 | -0.178006 |
| C | -2.003069 | -0.043129 | 1.419389  |
| H | -2.669637 | 0.678540  | 1.900261  |
| H | -1.955862 | -0.958941 | 2.010821  |
| H | -1.006043 | 0.375180  | 1.228077  |
| O | -4.182150 | -0.771730 | 0.031499  |

**Conformer 1d**

|   |           |           |           |
|---|-----------|-----------|-----------|
| C | 2.456268  | -1.202209 | -0.206315 |
| C | 3.619026  | -0.437071 | -0.018498 |
| C | 3.445293  | 0.946294  | 0.157076  |
| C | 2.179074  | 1.534184  | 0.183612  |
| C | 0.973910  | 0.782551  | -0.017091 |
| C | 1.183297  | -0.628241 | -0.180029 |
| H | 2.547661  | -2.281789 | -0.342622 |
| H | 0.301887  | -1.250604 | -0.332565 |
| H | 4.324922  | 1.575196  | 0.310000  |
| H | 2.076088  | 2.608987  | 0.327327  |
| O | -0.197633 | 1.316248  | -0.017282 |
| C | 4.992361  | -1.055624 | -0.098260 |
| H | 5.391178  | -1.059185 | -1.122030 |
| H | 5.707662  | -0.508641 | 0.526900  |
| H | 4.976400  | -2.095594 | 0.247665  |
| C | -3.081309 | 1.014300  | -0.977183 |
| H | -3.774370 | 1.675463  | -0.449168 |
| H | -2.047411 | 1.377428  | -0.940253 |
| H | -3.422183 | 0.864778  | -2.003404 |
| S | -3.116885 | -0.590077 | -0.171032 |
| C | -2.542723 | -0.014487 | 1.429052  |
| H | -3.281679 | 0.689040  | 1.823297  |
| H | -2.471881 | -0.885560 | 2.082629  |
| H | -1.564703 | 0.457041  | 1.263159  |
| O | -4.582940 | -0.986687 | -0.018794 |

**Conformer 2a**

|   |           |           |           |
|---|-----------|-----------|-----------|
| C | -2.859334 | -1.183300 | -0.000972 |
| C | -3.867279 | -0.250113 | 0.000125  |
| C | -1.917285 | 0.823808  | 0.000117  |
| N | -1.675065 | -0.489174 | -0.000843 |
| H | -0.710474 | -0.878821 | -0.002008 |
| H | -2.898710 | -2.260690 | -0.001905 |
| H | -4.939510 | -0.362306 | 0.000368  |
| H | -1.162562 | 1.596827  | 0.000639  |
| N | -3.250151 | 0.979361  | 0.000797  |
| H | -3.720536 | 1.876438  | 0.001593  |
| C | 2.903675  | -0.080259 | 1.405553  |
| H | 3.432334  | -1.033398 | 1.376344  |
| H | 3.591460  | 0.765823  | 1.392019  |
| H | 2.259955  | -0.030589 | 2.285030  |
| C | 2.908986  | -0.074943 | -1.402114 |
| H | 3.438573  | -1.027588 | -1.373850 |
| H | 2.268440  | -0.023320 | -2.283806 |
| H | 3.595716  | 0.771889  | -1.383412 |
| O | 0.964227  | -1.168463 | -0.004144 |
| S | 1.833338  | 0.029734  | -0.000135 |
| O | 1.157753  | 1.329403  | 0.001045  |

**Conformer 2b**

|   |           |           |           |
|---|-----------|-----------|-----------|
| C | 2.711025  | 0.619578  | -0.000150 |
| C | 3.596532  | -0.435795 | -0.000024 |
| C | 1.538917  | -1.280030 | 0.000134  |
| N | 1.454157  | 0.053449  | -0.000149 |
| H | 0.546041  | 0.555492  | -0.000510 |
| H | 4.674870  | -0.449491 | -0.000086 |
| H | 0.700045  | -1.960398 | 0.000117  |
| N | 2.843596  | -1.588214 | 0.000095  |
| H | 3.207392  | -2.533241 | 0.000152  |
| C | 2.935054  | 2.092176  | -0.000046 |
| H | 2.491229  | 2.552063  | -0.886271 |
| H | 2.494309  | 2.551529  | 0.888003  |
| H | 4.005319  | 2.302092  | -0.001844 |
| C | -3.151755 | 0.226215  | 1.403895  |
| H | -3.563372 | 1.235453  | 1.375803  |
| H | -3.935362 | -0.531930 | 1.387926  |
| H | -2.520411 | 0.098664  | 2.284526  |
| C | -3.153818 | 0.225294  | -1.402627 |
| H | -3.565426 | 1.234533  | -1.374522 |
| H | -2.523764 | 0.097248  | -2.284113 |
| H | -3.937358 | -0.532881 | -1.385024 |
| O | -1.093491 | 1.077223  | -0.001236 |
| S | -2.098776 | -0.008538 | -0.000077 |
| O | -1.585646 | -1.380199 | 0.000032  |

**Conformer 2c**

|   |           |           |           |
|---|-----------|-----------|-----------|
| C | -2.900012 | -0.837454 | 1.082464  |
| C | -2.055249 | 0.257507  | 1.273127  |
| C | -1.545692 | 1.042778  | 0.180826  |
| C | -2.087956 | 0.686613  | -1.103115 |
| C | -2.932776 | -0.409593 | -1.285124 |
| C | -3.371839 | -1.177367 | -0.195069 |
| H | -1.710638 | 0.515290  | 2.274286  |
| H | -3.237016 | -1.406023 | 1.949832  |
| H | -4.022170 | -2.035889 | -0.341173 |
| H | -3.295320 | -0.640403 | -2.287347 |
| H | -1.766667 | 1.278887  | -1.959608 |
| O | -0.678221 | 1.975428  | 0.336803  |
| C | 1.309879  | -0.195018 | 1.381960  |
| H | 0.811284  | 0.780310  | 1.393383  |
| H | 0.570300  | -0.993289 | 1.313168  |
| H | 1.968493  | -0.341849 | 2.239894  |
| C | 1.247198  | 0.180558  | -1.365088 |
| H | 0.775111  | 1.132884  | -1.103626 |
| H | 1.861623  | 0.247965  | -2.264721 |
| H | 0.489522  | -0.597356 | -1.464390 |
| O | 3.371213  | 0.789433  | 0.069410  |
| S | 2.352491  | -0.260503 | -0.050680 |
| O | 2.798795  | -1.647438 | -0.251052 |

**Conformer 2d**

|   |           |           |           |
|---|-----------|-----------|-----------|
| C | 1.602229  | -0.857702 | 1.209080  |
| C | 2.662636  | 0.051403  | 1.198184  |
| C | 3.203784  | 0.546646  | 0.000039  |
| C | 2.678712  | 0.025159  | -1.194185 |
| C | 1.618377  | -0.883879 | -1.199218 |
| C | 1.017108  | -1.385229 | 0.006542  |
| H | 1.218730  | -1.235400 | 2.156788  |
| H | 3.062388  | 0.410577  | 2.148869  |
| H | 3.091285  | 0.363363  | -2.147066 |
| H | 1.245970  | -1.281147 | -2.143367 |
| O | 0.019880  | -2.195133 | 0.008280  |
| C | 4.312611  | 1.569210  | -0.003735 |
| H | 4.956744  | 1.448513  | -0.882195 |
| H | 3.930660  | 2.599067  | -0.018276 |
| H | 4.943995  | 1.468835  | 0.886460  |
| C | -1.664378 | 0.031491  | 1.390814  |
| H | -1.299019 | -0.991128 | 1.244420  |
| H | -0.824670 | 0.725248  | 1.440233  |
| H | -2.307484 | 0.128920  | 2.267315  |
| C | -1.622506 | 0.069879  | -1.380654 |
| H | -1.276208 | -0.962152 | -1.260785 |
| H | -2.233778 | 0.209120  | -2.274126 |
| H | -0.771734 | 0.751914  | -1.376323 |
| O | -3.826322 | -0.450918 | -0.034998 |
| S | -2.672208 | 0.455667  | -0.004798 |
| O | -2.922681 | 1.905018  | 0.010919  |

## Local minimum Me<sub>2</sub>SO-imidazolium conformers (Fig. S1)

### *Conformer S1a*

|   |           |           |           |
|---|-----------|-----------|-----------|
| C | 3.155648  | 0.191515  | -1.384270 |
| H | 2.909126  | 1.253917  | -1.435410 |
| H | 4.235955  | 0.038554  | -1.333677 |
| H | 2.752365  | -0.330069 | -2.252547 |
| S | 2.383148  | -0.519311 | 0.073133  |
| C | 3.140243  | 0.569575  | 1.284512  |
| H | 2.895574  | 1.604036  | 1.035242  |
| H | 2.725706  | 0.309453  | 2.258731  |
| H | 4.220731  | 0.409872  | 1.291262  |
| O | 0.910964  | -0.116020 | 0.007495  |
| C | -1.779602 | 0.677037  | -0.079850 |
| C | -1.838168 | -0.684464 | 0.082103  |
| C | -3.929553 | 0.085725  | -0.012613 |
| N | -3.081400 | 1.116941  | -0.134120 |
| H | -3.373418 | 2.080539  | -0.249229 |
| H | -0.914093 | 1.314963  | -0.155355 |
| H | -1.028804 | -1.390350 | 0.166319  |
| H | -5.006843 | 0.131350  | -0.018930 |
| N | -3.172846 | -1.013047 | 0.118989  |
| H | -3.546069 | -1.948711 | 0.230136  |

### *Conformer S1b*

|   |           |           |           |
|---|-----------|-----------|-----------|
| C | 3.179348  | 0.229524  | -1.354204 |
| H | 3.183483  | 1.315794  | -1.249033 |
| H | 4.192569  | -0.177689 | -1.335397 |
| H | 2.683180  | -0.058619 | -2.281019 |
| S | 2.240923  | -0.474861 | -0.001932 |
| C | 3.179387  | 0.218493  | 1.356005  |
| H | 3.183325  | 1.305592  | 1.259764  |
| H | 2.683380  | -0.077346 | 2.280477  |
| H | 4.192675  | -0.188377 | 1.333723  |
| O | 0.919582  | 0.321086  | 0.001333  |
| C | -2.384735 | 1.130982  | 0.004290  |
| C | -3.698100 | 0.726639  | 0.002751  |
| C | -2.395563 | -1.074220 | -0.004068 |
| N | -1.607498 | 0.000325  | 0.000008  |
| H | -0.531777 | 0.003230  | 0.000043  |
| H | -1.953585 | 2.119185  | 0.008039  |
| H | -4.618189 | 1.288628  | 0.004878  |
| H | -2.076512 | -2.104391 | -0.007970 |
| N | -3.671133 | -0.647559 | -0.002455 |
| H | -4.481585 | -1.254783 | -0.004767 |

## Local minimum Me<sub>2</sub>SO-4-methylimidazolium conformers (Fig. S2)

### *Conformer S2a*

|   |           |           |           |
|---|-----------|-----------|-----------|
| C | 3.446616  | -0.333101 | 1.372503  |
| H | 3.130590  | -1.376242 | 1.435677  |
| H | 4.532099  | -0.253462 | 1.280816  |
| H | 3.112231  | 0.214571  | 2.253898  |
| S | 2.669158  | 0.428679  | -0.055856 |
| C | 3.304039  | -0.707992 | -1.293817 |
| H | 3.004280  | -1.724465 | -1.030999 |
| H | 2.868113  | -0.421324 | -2.251142 |
| H | 4.391470  | -0.618514 | -1.344543 |
| O | 1.176012  | 0.123841  | 0.068174  |
| C | -1.595108 | -0.617180 | -0.013274 |
| C | -2.158987 | 0.639909  | 0.019351  |
| C | -3.811068 | -0.877530 | 0.008993  |
| N | -2.634671 | -1.517583 | -0.018538 |
| H | -2.538408 | -2.525939 | -0.038021 |
| H | -4.791903 | -1.325554 | 0.011574  |
| N | -3.524963 | 0.432962  | 0.031639  |
| H | -4.225565 | 1.165387  | 0.055368  |
| H | -0.544878 | -0.882238 | -0.026888 |
| C | -1.516497 | 1.981481  | 0.041092  |
| H | -1.793290 | 2.563403  | -0.841926 |
| H | -1.803197 | 2.538335  | 0.936974  |
| H | -0.436402 | 1.825283  | 0.046005  |

### *Conformer S2b*

|   |           |           |           |
|---|-----------|-----------|-----------|
| C | -3.417210 | 0.261480  | 1.349545  |
| H | -3.188377 | 1.324505  | 1.251408  |
| H | -4.494845 | 0.084700  | 1.326933  |
| H | -3.000845 | -0.128385 | 2.278634  |
| S | -2.637708 | -0.629709 | -0.000745 |
| C | -3.417508 | 0.265041  | -1.348503 |
| H | -3.188235 | 1.327732  | -1.247788 |
| H | -3.001702 | -0.122624 | -2.278761 |
| H | -4.495197 | 0.088598  | -1.325841 |
| O | -1.174198 | -0.183253 | -0.000343 |
| C | 2.123895  | 0.683811  | 0.000367  |
| C | 1.653114  | -0.610873 | -0.000296 |
| C | 3.882170  | -0.707695 | -0.000342 |
| N | 3.501464  | 0.579043  | 0.000319  |
| H | 4.147483  | 1.360351  | 0.000732  |
| H | 0.619884  | -0.943151 | -0.000530 |
| H | 4.893259  | -1.082518 | -0.000519 |
| N | 2.755485  | -1.432348 | -0.000689 |
| H | 2.732237  | -2.445282 | -0.001185 |
| C | 1.380091  | 1.972591  | 0.001010  |
| H | 1.616894  | 2.561927  | 0.890720  |
| H | 1.616922  | 2.562820  | -0.888100 |
| H | 0.313481  | 1.739690  | 0.000866  |



***Conformer S2c***

|   |           |           |           |
|---|-----------|-----------|-----------|
| C | 3.640907  | -0.390700 | 1.351577  |
| H | 3.555561  | -1.472834 | 1.238263  |
| H | 4.684254  | -0.068251 | 1.335870  |
| H | 3.169702  | -0.070071 | 2.280770  |
| S | 2.762987  | 0.398633  | 0.005014  |
| C | 3.644791  | -0.358829 | -1.357215 |
| H | 3.558921  | -1.443313 | -1.269712 |
| H | 3.176387  | -0.016249 | -2.279966 |
| H | 4.688136  | -0.037076 | -1.330783 |
| O | 1.381515  | -0.284350 | -0.005116 |
| C | -1.996133 | -0.818618 | -0.006949 |
| C | -3.279588 | -0.316610 | -0.002537 |
| C | -1.818437 | 1.377764  | 0.010523  |
| N | -1.124206 | 0.241385  | 0.001240  |
| H | -0.057893 | 0.150327  | 0.000032  |
| H | -1.414437 | 2.377728  | 0.018438  |
| H | -1.648687 | -1.839657 | -0.015366 |
| N | -3.125458 | 1.055015  | 0.008413  |
| H | -3.881948 | 1.728742  | 0.013954  |
| C | -4.608719 | -0.989040 | -0.007420 |
| H | -4.468073 | -2.070470 | -0.016201 |
| H | -5.185194 | -0.727568 | 0.883621  |
| H | -5.185926 | -0.713235 | -0.893653 |

***Conformer S2d***

|   |           |           |           |
|---|-----------|-----------|-----------|
| C | 3.366600  | -0.232474 | 1.355388  |
| H | 3.479489  | -1.313294 | 1.254515  |
| H | 4.334341  | 0.273465  | 1.336988  |
| H | 2.841968  | 0.008497  | 2.280058  |
| S | 2.363665  | 0.369531  | -0.000704 |
| C | 3.366646  | -0.236935 | -1.354772 |
| H | 3.479483  | -1.317426 | -1.250366 |
| H | 2.842080  | 0.001041  | -2.280253 |
| H | 4.334407  | 0.269022  | -1.337963 |
| O | 1.124671  | -0.547472 | 0.000782  |
| C | -2.274402 | 0.744256  | -0.000472 |
| C | -3.558994 | 0.245097  | -0.000257 |
| C | -2.151494 | -1.471865 | 0.000992  |
| N | -1.434707 | -0.347698 | 0.000297  |
| H | -0.364324 | -0.326074 | 0.000467  |
| H | -1.760812 | -2.477219 | 0.001681  |
| N | -3.449396 | -1.125909 | 0.000625  |
| H | -4.220401 | -1.782207 | 0.000941  |
| H | -4.512551 | 0.748939  | -0.000679 |
| C | -1.771543 | 2.147025  | -0.001275 |
| H | -1.165495 | 2.343147  | 0.886730  |
| H | -1.164315 | 2.341702  | -0.888789 |
| H | -2.612032 | 2.842326  | -0.002406 |

**Conformer S2e**

|   |           |           |           |
|---|-----------|-----------|-----------|
| C | -3.338152 | 0.178082  | 1.356477  |
| H | -3.280713 | 1.263938  | 1.262801  |
| H | -4.372982 | -0.170424 | 1.334093  |
| H | -2.859495 | -0.147500 | 2.280148  |
| S | -2.439950 | -0.564428 | -0.003340 |
| C | -3.338492 | 0.196190  | -1.352884 |
| H | -3.280896 | 1.280688  | -1.244747 |
| H | -2.860124 | -0.117112 | -2.280939 |
| H | -4.373349 | -0.152498 | -1.334868 |
| O | -1.074076 | 0.151537  | 0.001291  |
| C | 2.275804  | 0.749408  | 0.002027  |
| C | 3.563208  | 0.257157  | 0.001579  |
| C | 2.165951  | -1.468812 | -0.004304 |
| N | 1.442796  | -0.348128 | -0.001834 |
| H | 0.376116  | -0.282081 | -0.001610 |
| H | 1.787934  | -2.478842 | -0.007283 |
| N | 3.461996  | -1.114449 | -0.002285 |
| H | 4.237035  | -1.765864 | -0.003479 |
| H | 4.514161  | 0.765937  | 0.003788  |
| C | 1.759303  | 2.146605  | 0.004938  |
| H | 1.151257  | 2.333722  | -0.882864 |
| H | 1.139909  | 2.325636  | 0.886511  |
| H | 2.593678  | 2.849210  | 0.013399  |

**Local minimum Me<sub>2</sub>SO<sub>2</sub>-imidazolium conformers (Fig. S3)**

**Conformer S3a**

|   |           |           |           |
|---|-----------|-----------|-----------|
| C | 1.862132  | -0.706906 | 0.000039  |
| C | 1.833658  | 0.666551  | -0.000216 |
| C | 3.969450  | 0.023391  | 0.000073  |
| N | 3.189473  | -1.066303 | 0.000125  |
| H | 3.540488  | -2.017219 | 0.000306  |
| H | 1.041370  | -1.409525 | 0.000126  |
| H | 0.984396  | 1.335622  | -0.000421 |
| H | 5.047642  | 0.045575  | 0.000126  |
| N | 3.145146  | 1.079925  | -0.000093 |
| H | 3.456409  | 2.044600  | -0.000162 |
| C | -3.002873 | -0.010645 | -1.401315 |
| H | -3.603517 | -0.920209 | -1.379128 |
| H | -3.623695 | 0.885278  | -1.379413 |
| H | -2.362207 | -0.003492 | -2.284294 |
| C | -3.003045 | -0.009721 | 1.401227  |
| H | -3.603711 | -0.919283 | 1.379545  |
| H | -2.362497 | -0.002011 | 2.284285  |
| H | -3.623849 | 0.886198  | 1.378653  |
| O | -1.144686 | -1.247491 | 0.000476  |
| S | -1.915024 | 0.001919  | 0.000019  |
| O | -1.173903 | 1.269040  | -0.000351 |

**Conformer S3b**

|   |           |           |           |
|---|-----------|-----------|-----------|
| C | -1.976126 | 0.916986  | -0.000114 |
| C | -3.346565 | 1.011162  | -0.000128 |
| C | -2.792889 | -1.143878 | 0.000067  |
| N | -1.671071 | -0.422432 | 0.000124  |
| H | -0.697788 | -0.798977 | 0.000067  |
| H | -1.201571 | 1.669010  | -0.000144 |
| H | -4.000625 | 1.868216  | -0.000207 |
| H | -2.864705 | -2.219984 | 0.000156  |
| N | -3.821168 | -0.279794 | -0.000040 |
| H | -4.797426 | -0.550477 | -0.000048 |
| C | 2.919859  | -0.115575 | 1.404135  |
| H | 3.408400  | -1.089833 | 1.375795  |
| H | 3.642171  | 0.701202  | 1.388281  |
| H | 2.280244  | -0.036583 | 2.284473  |
| C | 2.921718  | -0.116218 | -1.402832 |
| H | 3.410186  | -1.090476 | -1.373405 |
| H | 2.283276  | -0.037600 | -2.284058 |
| H | 3.644021  | 0.700553  | -1.386367 |
| O | 0.939124  | -1.128868 | -0.000495 |
| S | 1.852450  | 0.039084  | -0.000101 |
| O | 1.228914  | 1.361409  | -0.000789 |

**Local minimum Me<sub>2</sub>SO<sub>2</sub>-4-methylimidazolium conformers (Fig. S4)****Conformer S4a**

|   |           |           |           |
|---|-----------|-----------|-----------|
| C | -1.677795 | -0.554778 | 0.000386  |
| C | -2.284270 | 0.683249  | -0.000025 |
| C | -3.882748 | -0.892355 | -0.000079 |
| N | -2.685859 | -1.490938 | 0.000307  |
| H | -2.548644 | -2.495215 | 0.000522  |
| H | -0.629798 | -0.831011 | 0.000658  |
| H | -4.847738 | -1.373811 | -0.000213 |
| N | -3.642825 | 0.427094  | -0.000256 |
| H | -4.368190 | 1.135538  | -0.000578 |
| C | -1.709895 | 2.056735  | -0.000078 |
| H | -2.025370 | 2.609551  | -0.888870 |
| H | -2.024561 | 2.609266  | 0.889181  |
| H | -0.621290 | 1.983983  | -0.000574 |
| C | 3.287839  | -0.141930 | 1.400565  |
| H | 3.831810  | -1.086496 | 1.378697  |
| H | 3.962409  | 0.714315  | 1.377915  |
| H | 2.649334  | -0.094844 | 2.283894  |
| C | 3.287283  | -0.143775 | -1.400910 |
| H | 3.831235  | -1.088327 | -1.378027 |
| H | 2.648431  | -0.097812 | -2.284048 |
| H | 3.961885  | 0.712479  | -1.379630 |
| O | 1.364707  | -1.272492 | 0.000951  |
| S | 2.201533  | -0.063240 | -0.000007 |
| O | 1.527076  | 1.237273  | -0.000741 |

**Conformer S4b**

|   |           |           |           |
|---|-----------|-----------|-----------|
| C | 2.271298  | 0.734129  | -0.029900 |
| C | 3.611642  | 0.433006  | -0.142490 |
| C | 2.514854  | -1.471958 | 0.177461  |
| N | 1.630726  | -0.471322 | 0.168641  |
| H | 0.601830  | -0.604138 | 0.275702  |
| H | 4.465039  | 1.072493  | -0.303283 |
| H | 2.295590  | -2.519845 | 0.307938  |
| N | 3.727945  | -0.931130 | -0.010551 |
| H | 4.591525  | -1.458747 | -0.051142 |
| C | 1.556248  | 2.040881  | -0.062940 |
| H | 0.678978  | 1.991742  | -0.710885 |
| H | 1.223265  | 2.322991  | 0.939362  |
| H | 2.228387  | 2.816515  | -0.432467 |
| C | -3.087681 | -0.953923 | -1.188083 |
| H | -3.400110 | -1.887804 | -0.720313 |
| H | -3.941311 | -0.348383 | -1.494286 |
| H | -2.442719 | -1.153690 | -2.045075 |
| C | -3.183492 | 0.261069  | 1.341882  |
| H | -3.497462 | -0.697035 | 1.756463  |
| H | -2.596767 | 0.818279  | 2.073734  |
| H | -4.034011 | 0.856987  | 1.009287  |
| O | -1.018784 | -0.910779 | 0.430579  |
| S | -2.111013 | -0.023340 | -0.039299 |
| O | -1.731708 | 1.251030  | -0.637887 |

**Conformer S4c**

|   |           |           |           |
|---|-----------|-----------|-----------|
| C | 1.687215  | -0.499771 | -0.000192 |
| C | 3.063759  | -0.442721 | -0.000099 |
| C | 2.247358  | 1.643210  | -0.000320 |
| N | 1.220903  | 0.792858  | -0.000184 |
| H | 0.212068  | 1.048510  | -0.000167 |
| H | 2.190576  | 2.720197  | -0.000440 |
| N | 3.370447  | 0.904121  | -0.000182 |
| H | 4.307296  | 1.290451  | -0.000047 |
| H | 1.007769  | -1.338972 | -0.000135 |
| C | 4.098264  | -1.514183 | -0.000159 |
| H | 4.730739  | -1.449852 | -0.889209 |
| H | 4.731505  | -1.449244 | 0.888298  |
| H | 3.609086  | -2.488837 | 0.000390  |
| C | -3.304313 | -0.104798 | 1.403837  |
| H | -3.916025 | 0.797207  | 1.375111  |
| H | -3.913625 | -1.008981 | 1.388309  |
| H | -2.660196 | -0.098947 | 2.284436  |
| C | -3.305420 | -0.105250 | -1.402779 |
| H | -3.916978 | 0.796854  | -1.373957 |
| H | -2.661991 | -0.099870 | -2.283881 |
| H | -3.914848 | -1.009341 | -1.386390 |
| O | -1.472298 | 1.157518  | -0.000412 |
| S | -2.224475 | -0.118817 | 0.000103  |
| O | -1.437002 | -1.350754 | 0.000020  |

**Conformer S4d**

|   |           |           |           |
|---|-----------|-----------|-----------|
| C | -2.429174 | -1.082557 | -0.000120 |
| C | -3.423611 | -0.129168 | -0.000056 |
| C | -1.429991 | 0.894484  | 0.000117  |
| N | -1.224151 | -0.423637 | -0.000008 |
| H | -0.273472 | -0.840005 | -0.000036 |
| H | -0.655672 | 1.647704  | 0.000201  |
| N | -2.759959 | 1.082555  | 0.000116  |
| H | -3.205211 | 1.992696  | 0.000212  |
| H | -2.497229 | -2.158842 | -0.000245 |
| C | -4.908248 | -0.247501 | -0.000025 |
| H | -5.339317 | 0.219668  | 0.889059  |
| H | -5.339453 | 0.220865  | -0.888412 |
| H | -5.188802 | -1.301357 | -0.000723 |
| C | 3.379505  | -0.125020 | 1.403289  |
| H | 3.885816  | -1.090198 | 1.374341  |
| H | 4.086648  | 0.704868  | 1.387131  |
| H | 2.739201  | -0.059271 | 2.284216  |
| C | 3.379378  | -0.124208 | -1.403445 |
| H | 3.885697  | -1.089400 | -1.375098 |
| H | 2.738992  | -0.057959 | -2.284275 |
| H | 4.086517  | 0.705676  | -1.386878 |
| O | 1.411741  | -1.168869 | -0.000291 |
| S | 2.308005  | 0.008038  | 0.000009  |
| O | 1.666987  | 1.324910  | 0.000423  |

**Local minimum Me<sub>2</sub>SO-phenolate conformers (Fig. S5)****Conformer S5a**

|   |           |           |           |
|---|-----------|-----------|-----------|
| C | -1.978982 | -0.515445 | 1.139016  |
| C | -2.490975 | -0.610175 | -0.211009 |
| C | -2.146601 | 0.525913  | -1.039448 |
| C | -1.394605 | 1.605847  | -0.572726 |
| C | -0.898127 | 1.638839  | 0.742041  |
| C | -1.217244 | 0.561902  | 1.588871  |
| H | -2.214278 | -1.338808 | 1.812802  |
| H | -0.856364 | 0.564897  | 2.618126  |
| H | -0.325031 | 2.487832  | 1.107206  |
| H | -1.189292 | 2.439024  | -1.247815 |
| H | -2.517572 | 0.518615  | -2.063949 |
| O | -3.168613 | -1.598346 | -0.632269 |
| C | 2.242520  | 1.101462  | -0.934965 |
| H | 2.526546  | 0.646287  | -1.887641 |
| H | 1.246243  | 1.544478  | -0.978434 |
| H | 2.985898  | 1.846013  | -0.644686 |
| S | 2.251252  | -0.188342 | 0.324995  |
| C | 1.000088  | -1.208320 | -0.458830 |
| H | 1.375309  | -1.512383 | -1.439968 |
| H | 0.845007  | -2.084416 | 0.171710  |
| H | 0.065175  | -0.648364 | -0.532443 |
| O | 3.586348  | -0.907884 | 0.178202  |

***Conformer S5b***

|   |           |           |           |
|---|-----------|-----------|-----------|
| C | -2.446419 | -0.224093 | -0.879937 |
| C | -2.241279 | 1.152844  | -0.972024 |
| C | -1.590124 | 1.866426  | 0.051109  |
| C | -1.166295 | 1.146456  | 1.182544  |
| C | -1.358522 | -0.231497 | 1.281253  |
| C | -1.953924 | -1.017049 | 0.223861  |
| H | -2.943089 | -0.759784 | -1.688323 |
| H | -2.608876 | 1.687622  | -1.849038 |
| H | -1.451809 | 2.943102  | -0.015926 |
| H | -0.690624 | 1.675210  | 2.010505  |
| H | -1.004157 | -0.771972 | 2.158159  |
| O | -2.032179 | -2.285254 | 0.259646  |
| C | 2.168293  | 1.501803  | -0.118570 |
| H | 2.533328  | 1.612123  | -1.143512 |
| H | 1.169431  | 1.927479  | -0.001300 |
| H | 2.872799  | 1.962968  | 0.576135  |
| S | 2.106572  | -0.259528 | 0.271535  |
| C | 0.997824  | -0.693222 | -1.075077 |
| H | 1.563251  | -0.584253 | -2.005350 |
| H | 0.674260  | -1.725567 | -0.933349 |
| H | 0.121918  | -0.042852 | -1.047211 |
| O | 3.482315  | -0.812451 | -0.080185 |

***Conformer S5c***

|   |           |           |           |
|---|-----------|-----------|-----------|
| C | 2.328499  | -1.548397 | -0.000017 |
| C | 2.073109  | -0.873306 | 1.203206  |
| C | 1.573790  | 0.429870  | 1.207110  |
| C | 1.255407  | 1.143551  | -0.000047 |
| C | 1.573738  | 0.429770  | -1.207172 |
| C | 2.073146  | -0.873390 | -1.203306 |
| H | 2.705745  | -2.567837 | 0.000053  |
| H | 2.277472  | -1.368268 | 2.153140  |
| H | 1.386406  | 0.942824  | 2.150215  |
| H | 2.277415  | -1.368393 | -2.153232 |
| H | 1.386354  | 0.942637  | -2.150330 |
| O | 0.701430  | 2.302139  | -0.000022 |
| C | -1.749920 | 0.638027  | -1.327799 |
| H | -2.758235 | 1.061337  | -1.283176 |
| H | -0.978753 | 1.402725  | -1.187875 |
| H | -1.610791 | 0.106159  | -2.270410 |
| S | -1.614492 | -0.572512 | 0.000023  |
| C | -1.749252 | 0.638272  | 1.327664  |
| H | -2.757784 | 1.061173  | 1.283816  |
| H | -1.609014 | 0.106763  | 2.270308  |
| H | -0.978574 | 1.403330  | 1.186688  |
| O | -2.923864 | -1.360718 | 0.000346  |

***Conformer S5d***

|   |           |           |           |
|---|-----------|-----------|-----------|
| C | 2.266369  | -0.998446 | -1.101025 |
| C | 1.722432  | 0.270845  | -1.302729 |
| C | 1.438140  | 1.178461  | -0.219412 |
| C | 1.787435  | 0.666146  | 1.082559  |
| C | 2.336872  | -0.602877 | 1.273381  |
| C | 2.576782  | -1.462578 | 0.188615  |
| H | 2.451732  | -1.640340 | -1.962941 |
| H | 1.481959  | 0.613487  | -2.308390 |
| H | 1.608326  | 1.320946  | 1.934967  |
| H | 2.577632  | -0.932075 | 2.284847  |
| H | 3.002902  | -2.450997 | 0.340824  |
| O | 0.894680  | 2.322356  | -0.391816 |
| C | -1.895525 | 1.203862  | 0.669508  |
| H | -1.977967 | 0.876524  | 1.709499  |
| H | -0.907339 | 1.620199  | 0.432653  |
| H | -2.667268 | 1.946171  | 0.455583  |
| S | -2.248075 | -0.193096 | -0.402736 |
| C | -1.076562 | -1.341650 | 0.329604  |
| H | -1.327853 | -1.458012 | 1.387256  |
| H | -1.202115 | -2.293184 | -0.189765 |
| H | -0.058456 | -0.971694 | 0.199690  |
| O | -3.638183 | -0.700365 | -0.028615 |

***Conformer S5e***

|   |           |           |           |
|---|-----------|-----------|-----------|
| C | -2.244604 | -1.656114 | 0.241525  |
| C | -2.608505 | -0.873885 | -0.868478 |
| C | -2.278250 | 0.480144  | -0.939613 |
| C | -1.545613 | 1.159592  | 0.099546  |
| C | -1.226004 | 0.326461  | 1.232108  |
| C | -1.562568 | -1.027155 | 1.294807  |
| H | -2.506292 | -2.709949 | 0.293524  |
| H | -3.155125 | -1.331802 | -1.693702 |
| H | -2.559763 | 1.070138  | -1.811124 |
| H | -1.280042 | -1.604050 | 2.175897  |
| H | -0.702660 | 0.798531  | 2.062999  |
| O | -1.177721 | 2.380678  | 0.012608  |
| C | 1.893016  | 1.421409  | -0.100485 |
| H | 2.268877  | 1.589118  | -1.113990 |
| H | 0.844519  | 1.732683  | -0.003878 |
| H | 2.514533  | 1.969907  | 0.610410  |
| S | 2.108016  | -0.320990 | 0.280295  |
| C | 1.092058  | -0.963701 | -1.056624 |
| H | 1.482857  | -0.573871 | -2.000580 |
| H | 1.194386  | -2.049727 | -1.032206 |
| H | 0.049780  | -0.681309 | -0.899292 |
| O | 3.553157  | -0.664970 | -0.073794 |

**Conformer S5f**

|   |           |           |           |
|---|-----------|-----------|-----------|
| C | -1.672881 | 0.956220  | 0.863664  |
| C | -1.384183 | 0.909217  | -0.544612 |
| C | -2.076673 | -0.133419 | -1.253164 |
| C | -2.876204 | -1.079196 | -0.609955 |
| C | -3.095512 | -1.023572 | 0.775754  |
| C | -2.469762 | 0.002798  | 1.500405  |
| H | -1.912806 | -0.192239 | -2.328961 |
| H | -3.359354 | -1.857579 | -1.201624 |
| H | -3.711256 | -1.766889 | 1.275711  |
| H | -2.634564 | 0.080573  | 2.575654  |
| H | -1.206931 | 1.752895  | 1.442526  |
| O | -0.561177 | 1.710615  | -1.117245 |
| C | 1.229326  | -1.124534 | -0.566791 |
| H | 0.765939  | -1.392435 | 0.385972  |
| H | 0.534935  | -0.539499 | -1.172955 |
| H | 1.557437  | -2.021389 | -1.095524 |
| S | 2.694874  | -0.128781 | -0.267466 |
| C | 1.879427  | 1.113642  | 0.737054  |
| H | 1.507558  | 0.625425  | 1.641584  |
| H | 2.630123  | 1.862912  | 0.996206  |
| H | 1.059900  | 1.548614  | 0.144992  |
| O | 3.617403  | -0.931468 | 0.642461  |

**Local minimum Me<sub>2</sub>SO-4-methylphenolate conformers (Fig. S6)**

**Conformer S6a**

|   |           |           |           |
|---|-----------|-----------|-----------|
| C | 1.919076  | -0.433241 | -1.201635 |
| C | 2.518579  | -0.825286 | 0.054952  |
| C | 2.166662  | 0.051757  | 1.149758  |
| C | 1.342395  | 1.169552  | 0.993813  |
| C | 0.756911  | 1.501706  | -0.241008 |
| C | 1.080179  | 0.672342  | -1.332433 |
| H | 2.143071  | -1.053412 | -2.069390 |
| H | 0.654193  | 0.901573  | -2.311898 |
| H | 1.139971  | 1.802121  | 1.862586  |
| H | 2.590180  | -0.181973 | 2.126279  |
| O | 3.264742  | -1.845704 | 0.186467  |
| C | -0.055053 | 2.758299  | -0.424993 |
| H | 0.548911  | 3.588941  | -0.816037 |
| H | -0.882299 | 2.597466  | -1.127566 |
| H | -0.484941 | 3.093936  | 0.526822  |
| C | -2.200239 | 0.468653  | 1.291989  |
| H | -2.565796 | -0.239221 | 2.041149  |
| H | -1.196977 | 0.826146  | 1.529158  |
| H | -2.898036 | 1.302892  | 1.200773  |
| S | -2.155113 | -0.380848 | -0.299149 |
| C | -0.950082 | -1.614443 | 0.201640  |
| H | -1.385538 | -2.198146 | 1.017815  |
| H | -0.756886 | -2.256451 | -0.658471 |
| H | -0.020240 | -1.121281 | 0.495816  |
| O | -3.499040 | -1.087428 | -0.434361 |



**Conformer S6b**

|   |           |           |           |
|---|-----------|-----------|-----------|
| C | -1.590340 | -0.662850 | -1.153242 |
| C | -2.327698 | -1.052882 | 0.026941  |
| C | -2.362701 | -0.019008 | 1.039334  |
| C | -1.729786 | 1.215584  | 0.889781  |
| C | -0.992701 | 1.544024  | -0.263229 |
| C | -0.961973 | 0.578431  | -1.284119 |
| H | -1.548208 | -1.385671 | -1.968723 |
| H | -0.421468 | 0.805224  | -2.206722 |
| H | -1.792911 | 1.944304  | 1.701734  |
| H | -2.914447 | -0.242556 | 1.952155  |
| O | -2.883613 | -2.188009 | 0.163589  |
| C | -0.342357 | 2.893422  | -0.429996 |
| H | -1.053037 | 3.661104  | -0.767038 |
| H | 0.092910  | 3.244122  | 0.513772  |
| H | 0.466210  | 2.847044  | -1.167885 |
| C | 1.946273  | -1.472239 | -1.008575 |
| H | 2.276052  | -2.349609 | -0.445746 |
| H | 0.883525  | -1.527787 | -1.253808 |
| H | 2.549577  | -1.363856 | -1.911671 |
| S | 2.235816  | -0.015357 | 0.013310  |
| C | 1.137118  | -0.518320 | 1.341448  |
| H | 1.520982  | -1.451826 | 1.763017  |
| H | 1.152667  | 0.269218  | 2.096145  |
| H | 0.120948  | -0.630698 | 0.955150  |
| O | 3.663504  | -0.138274 | 0.533486  |

**Conformer S6c**

|   |           |           |           |
|---|-----------|-----------|-----------|
| C | 1.509432  | -0.713431 | -1.150121 |
| C | 2.225962  | -1.134365 | 0.032022  |
| C | 2.396979  | -0.070114 | 0.997081  |
| C | 1.849957  | 1.203555  | 0.830744  |
| C | 1.101759  | 1.553364  | -0.308072 |
| C | 0.957099  | 0.561584  | -1.294215 |
| H | 1.400690  | -1.448930 | -1.947869 |
| H | 0.416802  | 0.805466  | -2.212034 |
| H | 2.010035  | 1.954277  | 1.608498  |
| H | 2.973573  | -0.304003 | 1.891755  |
| O | 2.679153  | -2.311625 | 0.194676  |
| C | 0.435489  | 2.898815  | -0.436009 |
| H | -0.580209 | 2.904049  | -0.014050 |
| H | 1.009974  | 3.674923  | 0.083499  |
| H | 0.346253  | 3.197117  | -1.487040 |
| C | -1.154188 | -0.234464 | 1.365026  |
| H | -1.572373 | -1.042365 | 1.972480  |
| H | -0.137693 | -0.457663 | 1.031887  |
| H | -1.155055 | 0.699112  | 1.929677  |
| S | -2.222882 | -0.006616 | -0.060213 |
| C | -1.929165 | -1.641359 | -0.759107 |
| H | -2.254167 | -2.387610 | -0.029399 |
| H | -2.533357 | -1.721099 | -1.664538 |
| H | -0.866384 | -1.741986 | -0.990498 |
| O | -3.660641 | -0.009243 | 0.446191  |

***Conformer S6d***

|   |           |           |           |
|---|-----------|-----------|-----------|
| C | 1.031347  | -1.078923 | 1.204008  |
| C | 0.517407  | -1.672651 | 0.000122  |
| C | 1.031692  | -1.079196 | -1.203780 |
| C | 1.895554  | 0.017657  | -1.196506 |
| C | 2.335094  | 0.607386  | 0.000055  |
| C | 1.895163  | 0.017987  | 1.196604  |
| H | 0.702692  | -1.508913 | 2.150149  |
| H | 2.228975  | 0.437314  | 2.148228  |
| H | 2.229709  | 0.436693  | -2.148132 |
| H | 0.703059  | -1.509626 | -2.149727 |
| O | -0.361694 | -2.609936 | 0.000067  |
| C | 3.292541  | 1.772685  | -0.000044 |
| H | 4.342785  | 1.449370  | -0.000265 |
| H | 3.144130  | 2.402884  | -0.884127 |
| H | 3.144472  | 2.402777  | 0.884172  |
| C | -2.145033 | -0.222309 | 1.326342  |
| H | -3.237190 | -0.279479 | 1.281445  |
| H | -1.677964 | -1.202479 | 1.184263  |
| H | -1.833896 | 0.228544  | 2.270091  |
| S | -1.608473 | 0.873954  | -0.000046 |
| C | -2.144880 | -0.222153 | -1.326646 |
| H | -3.237029 | -0.279458 | -1.281818 |
| H | -1.833729 | 0.228950  | -2.270280 |
| H | -1.677672 | -1.202265 | -1.184781 |
| O | -2.577816 | 2.056128  | 0.000006  |

***Conformer S6e***

|   |           |           |           |
|---|-----------|-----------|-----------|
| C | -2.329583 | -0.600440 | -0.000157 |
| C | -1.891118 | -0.010181 | -1.196810 |
| C | -1.046051 | 1.101391  | -1.203740 |
| C | -0.521953 | 1.686597  | -0.000092 |
| C | -1.046448 | 1.101704  | 1.203469  |
| C | -1.891515 | -0.009862 | 1.196473  |
| H | -2.231984 | -0.424307 | -2.148173 |
| H | -0.728530 | 1.540905  | -2.149349 |
| H | -2.232701 | -0.423796 | 2.147805  |
| H | -0.729203 | 1.541341  | 2.149119  |
| O | 0.355358  | 2.625466  | 0.000019  |
| C | -3.173270 | -1.850518 | -0.000198 |
| H | -2.559195 | -2.760849 | -0.000313 |
| H | -3.818871 | -1.890650 | 0.884953  |
| H | -3.818956 | -1.890499 | -0.885298 |
| C | 2.127169  | 0.221834  | 1.327191  |
| H | 3.219753  | 0.271301  | 1.283473  |
| H | 1.666885  | 1.205188  | 1.185647  |
| H | 1.811865  | -0.227343 | 2.270354  |
| S | 1.584824  | -0.870208 | -0.000333 |
| C | 2.128959  | 0.223842  | -1.325422 |
| H | 3.221453  | 0.273782  | -1.279765 |
| H | 1.815540  | -0.224315 | -2.269698 |
| H | 1.667938  | 1.206808  | -1.183406 |
| O | 2.547352  | -2.058021 | -0.000556 |

**Conformer S6f**

|   |           |           |           |
|---|-----------|-----------|-----------|
| C | 0.847042  | -0.805364 | 1.228211  |
| C | 0.950035  | -1.735465 | 0.132552  |
| C | 1.813977  | -1.282882 | -0.928228 |
| C | 2.430098  | -0.029614 | -0.918642 |
| C | 2.266874  | 0.873241  | 0.148085  |
| C | 1.470352  | 0.444843  | 1.222792  |
| H | 0.245588  | -1.110076 | 2.084251  |
| H | 1.332670  | 1.108277  | 2.079224  |
| H | 3.059302  | 0.258001  | -1.763970 |
| H | 1.958148  | -1.957765 | -1.771453 |
| O | 0.311421  | -2.843072 | 0.097024  |
| C | 2.875216  | 2.252658  | 0.115564  |
| H | 3.056318  | 2.625906  | 1.129958  |
| H | 3.835046  | 2.250062  | -0.414181 |
| H | 2.226561  | 2.982475  | -0.388970 |
| C | -2.430072 | -1.124906 | -0.095622 |
| H | -2.819458 | -1.200563 | -1.115026 |
| H | -1.499844 | -1.695524 | 0.024250  |
| H | -3.184524 | -1.485622 | 0.606756  |
| S | -2.192531 | 0.617947  | 0.274454  |
| C | -1.060904 | 0.970720  | -1.078354 |
| H | -1.578105 | 0.742687  | -2.014704 |
| H | -0.831430 | 2.036808  | -1.030585 |
| H | -0.147704 | 0.384850  | -0.962935 |
| O | -3.504894 | 1.317314  | -0.073529 |

**Conformer S6g**

|   |           |           |           |
|---|-----------|-----------|-----------|
| C | 1.487826  | -0.449729 | -1.208664 |
| C | 0.838813  | 0.787228  | -1.223012 |
| C | 0.928595  | 1.730617  | -0.137643 |
| C | 1.781184  | 1.292330  | 0.938252  |
| C | 2.421655  | 0.051401  | 0.938021  |
| C | 2.281873  | -0.859829 | -0.124976 |
| H | 1.359957  | -1.123732 | -2.058365 |
| H | 0.228019  | 1.071367  | -2.079527 |
| H | 1.894951  | 1.967316  | 1.786046  |
| H | 3.041568  | -0.224982 | 1.793936  |
| O | 0.275128  | 2.829957  | -0.115259 |
| C | 3.012899  | -2.178786 | -0.135509 |
| H | 4.026638  | -2.090351 | -0.550280 |
| H | 3.110411  | -2.585147 | 0.877982  |
| H | 2.477240  | -2.919218 | -0.740445 |
| C | -2.454698 | 1.105683  | 0.064489  |
| H | -2.857113 | 1.196011  | 1.077633  |
| H | -1.525414 | 1.678591  | -0.052742 |
| H | -3.201997 | 1.451522  | -0.652852 |
| S | -2.205802 | -0.641988 | -0.273220 |
| C | -1.081509 | -0.966196 | 1.092285  |
| H | -1.600952 | -0.715592 | 2.021594  |
| H | -0.854309 | -2.033352 | 1.069345  |
| H | -0.166314 | -0.385297 | 0.966401  |
| O | -3.517588 | -1.341413 | 0.076926  |

**Conformer S6h**

|   |           |           |           |
|---|-----------|-----------|-----------|
| C | -1.256725 | -0.879479 | 1.150604  |
| C | -0.831308 | -1.425402 | -0.108981 |
| C | -1.581979 | -0.939261 | -1.234213 |
| C | -2.560080 | 0.050456  | -1.119261 |
| C | -2.916259 | 0.601784  | 0.123513  |
| C | -2.234211 | 0.113673  | 1.250490  |
| H | -0.761646 | -1.247189 | 2.048916  |
| H | -2.498514 | 0.499297  | 2.237504  |
| H | -3.081282 | 0.387567  | -2.017892 |
| H | -1.329625 | -1.348324 | -2.212521 |
| O | 0.141975  | -2.256269 | -0.223680 |
| C | -3.932727 | 1.710690  | 0.233786  |
| H | -3.482083 | 2.704772  | 0.109199  |
| H | -4.712471 | 1.609031  | -0.530017 |
| H | -4.423934 | 1.696849  | 1.213501  |
| C | 2.258489  | -0.459981 | 1.210383  |
| H | 1.720470  | 0.337830  | 1.728877  |
| H | 1.576692  | -1.257290 | 0.877483  |
| H | 3.056078  | -0.850354 | 1.845671  |
| S | 3.034957  | 0.247819  | -0.243525 |
| C | 1.506348  | 0.708708  | -1.068003 |
| H | 0.904941  | 1.332244  | -0.401816 |
| H | 1.783866  | 1.266825  | -1.964155 |
| H | 0.965354  | -0.205804 | -1.319775 |
| O | 3.734719  | 1.534060  | 0.180119  |

**Conformer S6i**

|   |           |           |           |
|---|-----------|-----------|-----------|
| C | -1.291400 | 0.868230  | 1.098063  |
| C | -0.832760 | 1.331135  | -0.182938 |
| C | -1.545112 | 0.762622  | -1.294218 |
| C | -2.605021 | -0.132284 | -1.135260 |
| C | -3.016288 | -0.578784 | 0.132096  |
| C | -2.350401 | -0.031309 | 1.241339  |
| H | -1.245623 | 1.083821  | -2.291835 |
| H | -3.104250 | -0.525617 | -2.023384 |
| H | -2.646377 | -0.344594 | 2.244819  |
| H | -0.800135 | 1.274309  | 1.981872  |
| O | 0.165345  | 2.128117  | -0.326795 |
| C | -4.193518 | -1.506982 | 0.298077  |
| H | -5.144988 | -0.963553 | 0.378946  |
| H | -4.280291 | -2.189524 | -0.555144 |
| H | -4.089578 | -2.117232 | 1.202583  |
| C | 1.643037  | -0.761961 | -1.052713 |
| H | 1.093032  | -1.450396 | -0.406466 |
| H | 1.033623  | 0.113318  | -1.288388 |
| H | 1.973157  | -1.274836 | -1.957991 |
| S | 3.120410  | -0.201090 | -0.197824 |
| C | 2.267504  | 0.448616  | 1.240330  |
| H | 1.758102  | -0.380118 | 1.739029  |
| H | 3.024885  | 0.876286  | 1.900272  |
| H | 1.556368  | 1.211262  | 0.888986  |
| O | 3.895815  | -1.439539 | 0.237198  |

## Local minimum Me<sub>2</sub>SO<sub>2</sub>-phenolate conformers (Fig. S7)

### *Conformer S7a*

|   |           |           |           |
|---|-----------|-----------|-----------|
| C | 1.983117  | 0.395914  | -1.209906 |
| C | 2.376384  | -0.943280 | -1.197027 |
| C | 2.535975  | -1.644722 | 0.009723  |
| C | 2.364300  | -0.935220 | 1.210129  |
| C | 1.971333  | 0.404319  | 1.209651  |
| C | 1.818794  | 1.173622  | -0.003666 |
| H | 1.878448  | 0.926615  | -2.156204 |
| H | 2.518748  | -1.464226 | -2.144813 |
| H | 2.851782  | -2.685011 | 0.014833  |
| H | 2.498133  | -1.449198 | 2.162906  |
| H | 1.856932  | 0.941244  | 2.151277  |
| O | 1.514629  | 2.409712  | -0.009262 |
| C | -0.909264 | -1.349612 | -0.047314 |
| H | -0.326986 | -1.209022 | -0.957609 |
| H | -0.263368 | -1.215959 | 0.820736  |
| H | -1.397854 | -2.325628 | -0.033672 |
| C | -1.362260 | 1.398767  | 0.013569  |
| H | -0.742329 | 1.488016  | -0.877597 |
| H | -2.138811 | 2.165665  | 0.030129  |
| H | -0.727191 | 1.463913  | 0.896002  |
| O | -2.983211 | -0.255687 | -1.248181 |
| S | -2.217179 | -0.152831 | 0.001718  |
| O | -2.931781 | -0.302753 | 1.276888  |

### *Conformer S7b*

|   |           |           |           |
|---|-----------|-----------|-----------|
| C | -2.875149 | -1.452472 | 0.097591  |
| C | -2.858682 | -0.684255 | -1.079239 |
| C | -2.291866 | 0.589841  | -1.103217 |
| C | -1.626677 | 1.164249  | 0.037078  |
| C | -1.751236 | 0.385363  | 1.241949  |
| C | -2.320469 | -0.889958 | 1.258174  |
| H | -3.314140 | -2.446740 | 0.112064  |
| H | -3.313602 | -1.081273 | -1.987338 |
| H | -1.335221 | 0.809104  | 2.155101  |
| H | -2.350664 | -1.447532 | 2.194806  |
| H | -2.271716 | 1.166130  | -2.027760 |
| O | -0.965462 | 2.259460  | -0.021509 |
| C | 1.599414  | 0.876239  | 1.140215  |
| H | 0.868530  | 1.559894  | 0.683682  |
| H | 1.128460  | 0.287928  | 1.926956  |
| H | 2.472113  | 1.410407  | 1.520775  |
| C | 0.774957  | -0.715395 | -0.997243 |
| H | 0.381687  | 0.172782  | -1.490334 |
| H | 1.109078  | -1.458480 | -1.723862 |
| H | 0.025644  | -1.134691 | -0.323070 |
| O | 3.110448  | 0.493198  | -0.986353 |
| S | 2.221701  | -0.248296 | -0.082678 |
| O | 2.748871  | -1.440966 | 0.596610  |

## Local minimum Me<sub>2</sub>SO<sub>2</sub>-4-methylphenolate conformers (Fig. S8)

### *Conformer S8a*

|   |           |           |           |
|---|-----------|-----------|-----------|
| C | -1.564463 | 1.018799  | 1.208990  |
| C | -2.204221 | -0.223325 | 1.204950  |
| C | -2.531223 | -0.888444 | 0.009947  |
| C | -2.242906 | -0.212279 | -1.188491 |
| C | -1.605399 | 1.030203  | -1.203639 |
| C | -1.259791 | 1.747472  | 0.000262  |
| H | -1.342311 | 1.514049  | 2.154247  |
| H | -2.430534 | -0.705685 | 2.158697  |
| H | -2.498203 | -0.688221 | -2.138326 |
| H | -1.417226 | 1.535537  | -2.151070 |
| O | -0.701945 | 2.893045  | -0.002750 |
| C | -3.167746 | -2.255948 | 0.014338  |
| H | -3.802741 | -2.397656 | -0.867786 |
| H | -2.423665 | -3.064997 | 0.012796  |
| H | -3.796565 | -2.395709 | 0.901180  |
| C | 1.890785  | 1.271324  | 0.002840  |
| H | 1.348134  | 1.496692  | -0.914690 |
| H | 1.244197  | 1.474569  | 0.855225  |
| H | 2.816171  | 1.847193  | 0.062409  |
| C | 0.849497  | -1.306674 | -0.176810 |
| H | 0.425986  | -1.078003 | -1.153964 |
| H | 1.099966  | -2.365975 | -0.090367 |
| H | 0.155869  | -0.996620 | 0.606455  |
| O | 3.205419  | -0.686005 | -1.180483 |
| S | 2.381270  | -0.431000 | 0.009636  |
| O | 2.938202  | -0.752783 | 1.330322  |

### *Conformer S8b*

|   |           |           |           |
|---|-----------|-----------|-----------|
| C | 1.578765  | 1.021281  | -1.206132 |
| C | 2.227763  | -0.215357 | -1.194231 |
| C | 2.531974  | -0.887051 | 0.003034  |
| C | 2.215897  | -0.218081 | 1.198821  |
| C | 1.566358  | 1.018516  | 1.206593  |
| C | 1.251992  | 1.745338  | -0.000667 |
| H | 1.363818  | 1.515389  | -2.153774 |
| H | 2.469083  | -0.695297 | -2.145690 |
| H | 2.448303  | -0.699514 | 2.151706  |
| H | 1.341438  | 1.510198  | 2.153162  |
| O | 0.689053  | 2.888150  | -0.002047 |
| C | 3.283757  | -2.194445 | 0.005264  |
| H | 3.041920  | -2.789567 | -0.882988 |
| H | 4.373001  | -2.049640 | 0.013292  |
| H | 3.029431  | -2.794029 | 0.887008  |
| C | -0.863893 | -1.329563 | -0.049025 |
| H | -0.326905 | -1.068922 | -0.960957 |
| H | -0.260247 | -1.060105 | 0.818195  |
| H | -1.133397 | -2.387464 | -0.033879 |
| C | -1.892524 | 1.258962  | 0.012811  |
| H | -1.305132 | 1.477936  | -0.878019 |
| H | -2.814740 | 1.842683  | 0.028703  |

|   |           |           |           |
|---|-----------|-----------|-----------|
| H | -1.285787 | 1.458924  | 0.894983  |
| O | -3.125118 | -0.703527 | -1.247425 |
| S | -2.397293 | -0.439118 | 0.001614  |
| O | -3.062012 | -0.738663 | 1.277427  |

***Conformer S8c***

|   |           |           |           |
|---|-----------|-----------|-----------|
| C | -1.343475 | -0.883916 | -1.238989 |
| C | -2.117849 | 0.279619  | -1.227480 |
| C | -2.758483 | 0.733370  | -0.061925 |
| C | -2.602956 | -0.055476 | 1.092663  |
| C | -1.833396 | -1.219774 | 1.094476  |
| C | -1.077095 | -1.651606 | -0.050985 |
| H | -0.874378 | -1.215475 | -2.164674 |
| H | -2.248555 | 0.839299  | -2.156110 |
| H | -3.120261 | 0.239484  | 2.008236  |
| H | -1.724081 | -1.803027 | 2.008564  |
| O | -0.237960 | -2.619451 | -0.013085 |
| C | -3.544494 | 2.020775  | -0.040971 |
| H | -3.980283 | 2.231095  | -1.024382 |
| H | -4.366208 | 1.968733  | 0.682658  |
| H | -2.923370 | 2.884704  | 0.231769  |
| C | 2.022893  | -0.742131 | -1.127046 |
| H | 1.437121  | -1.552461 | -0.668261 |
| H | 1.449942  | -0.264021 | -1.920693 |
| H | 2.984561  | -1.099477 | -1.500398 |
| C | 0.902245  | 0.675986  | 1.000577  |
| H | 0.694161  | -0.265006 | 1.508206  |
| H | 1.084023  | 1.480672  | 1.715783  |
| H | 0.082643  | 0.926734  | 0.324464  |
| O | 3.430748  | -0.046038 | 0.991689  |
| S | 2.410605  | 0.494761  | 0.084267  |
| O | 2.688545  | 1.761923  | -0.608024 |

***Conformer S8d***

|   |           |           |           |
|---|-----------|-----------|-----------|
| C | -1.827048 | -1.221879 | -1.093801 |
| C | -2.598973 | -0.058107 | -1.096874 |
| C | -2.755516 | 0.736498  | 0.052503  |
| C | -2.114809 | 0.288821  | 1.221461  |
| C | -1.339065 | -0.872559 | 1.238406  |
| C | -1.075287 | -1.649781 | 0.054760  |
| H | -1.709343 | -1.803405 | -2.007883 |
| H | -3.111309 | 0.235558  | -2.015507 |
| H | -2.242556 | 0.854877  | 2.146873  |
| H | -0.863731 | -1.195099 | 2.164141  |
| O | -0.234530 | -2.616544 | 0.025122  |
| C | -3.593905 | 1.990984  | 0.046369  |
| H | -4.451656 | 1.912665  | 0.727018  |
| H | -3.015163 | 2.871564  | 0.352088  |
| H | -3.987376 | 2.187358  | -0.956941 |
| C | 0.907323  | 0.674982  | -1.001475 |
| H | 0.700944  | -0.266664 | -1.508583 |
| H | 0.087362  | 0.924757  | -0.325334 |
| H | 1.087023  | 1.480054  | -1.716729 |
| C | 2.030020  | -0.738016 | 1.128627  |

|   |          |           |           |
|---|----------|-----------|-----------|
| H | 1.441503 | -1.547990 | 0.672674  |
| H | 2.992219 | -1.096497 | 1.499477  |
| H | 1.460446 | -0.258109 | 1.923615  |
| O | 3.436837 | -0.044252 | -0.991482 |
| S | 2.415980 | 0.497174  | -0.085196 |
| O | 2.692633 | 1.765857  | 0.604906  |

***Conformer S8e***

|   |           |           |           |
|---|-----------|-----------|-----------|
| C | -2.776591 | -0.728218 | 0.046595  |
| C | -2.607832 | 0.068004  | -1.101023 |
| C | -1.811385 | 1.213709  | -1.095078 |
| C | -1.065984 | 1.636105  | 0.060964  |
| C | -1.333157 | 0.852930  | 1.238378  |
| C | -2.132859 | -0.293006 | 1.217420  |
| H | -3.117268 | -0.218990 | -2.023546 |
| H | -0.850493 | 1.162069  | 2.164744  |
| H | -2.265348 | -0.864271 | 2.138770  |
| H | -1.679334 | 1.794487  | -2.007753 |
| O | -0.216678 | 2.595773  | 0.033876  |
| C | -3.678673 | -1.937141 | 0.043629  |
| H | -3.354300 | -2.671745 | 0.789158  |
| H | -4.721555 | -1.677298 | 0.272312  |
| H | -3.673450 | -2.431465 | -0.934554 |
| C | 2.040766  | 0.721320  | 1.140826  |
| H | 1.449996  | 1.533642  | 0.691452  |
| H | 1.471812  | 0.231761  | 1.930375  |
| H | 3.001349  | 1.079273  | 1.516317  |
| C | 0.923991  | -0.669251 | -1.005699 |
| H | 0.716388  | 0.279260  | -1.499423 |
| H | 1.106542  | -1.463648 | -1.732040 |
| H | 0.104014  | -0.930574 | -0.333921 |
| O | 3.452262  | 0.053532  | -0.984382 |
| S | 2.431304  | -0.499858 | -0.085492 |
| O | 2.709556  | -1.775740 | 0.590495  |
